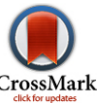

# BiP Clustering Facilitates Protein Folding in the Endoplasmic Reticulum

Marc Griesemer<sup>1</sup>\*, Carissa Young<sup>2</sup>§, Anne S. Robinson<sup>2,3</sup>, Linda Petzold<sup>4</sup>

**1** Department of Applied Mathematics, University of California, Merced, Merced, California, United States of America, **2** Department of Chemical Engineering, University of Delaware, Newark, Delaware, United States of America, **3** Department of Chemical and Biomolecular Engineering, Tulane University, New Orleans, Louisiana, United States of America, **4** Department of Computer Science, University of California, Santa Barbara, Santa Barbara, California, United States of America

## Abstract

The chaperone BiP participates in several regulatory processes within the endoplasmic reticulum (ER): translocation, protein folding, and ER-associated degradation. To facilitate protein folding, a cooperative mechanism known as entropic pulling has been proposed to demonstrate the molecular-level understanding of how multiple BiP molecules bind to nascent and unfolded proteins. Recently, experimental evidence revealed the spatial heterogeneity of BiP within the nuclear and peripheral ER of *S. cerevisiae* (commonly referred to as ‘clusters’). Here, we developed a model to evaluate the potential advantages of accounting for multiple BiP molecules binding to peptides, while proposing that BiP’s spatial heterogeneity may enhance protein folding and maturation. Scenarios were simulated to gauge the effectiveness of binding multiple chaperone molecules to peptides. Using two metrics: folding efficiency and chaperone cost, we determined that the single binding site model achieves a higher efficiency than models characterized by multiple binding sites, in the absence of cooperativity. Due to entropic pulling, however, multiple chaperones perform in concert to facilitate the resolubilization and ultimate yield of folded proteins. As a result of cooperativity, multiple binding site models used fewer BiP molecules and maintained a higher folding efficiency than the single binding site model. These *in silico* investigations reveal that clusters of BiP molecules bound to unfolded proteins may enhance folding efficiency through cooperative action via entropic pulling.

**Citation:** Griesemer M, Young C, Robinson AS, Petzold L (2014) BiP Clustering Facilitates Protein Folding in the Endoplasmic Reticulum. *PLoS Comput Biol* 10(7): e1003675. doi:10.1371/journal.pcbi.1003675

**Editor:** James M. Briggs, University of Houston, United States of America

**Received:** November 4, 2013; **Accepted:** May 3, 2014; **Published:** July 3, 2014

**Copyright:** © 2014 Griesemer et al. This is an open-access article distributed under the terms of the Creative Commons Attribution License, which permits unrestricted use, distribution, and reproduction in any medium, provided the original author and source are credited.

**Funding:** Funding provided by the NSF Integrative Graduate Education and Research Traineeship (IGERT) 0221651 (CY) and 0221715 (MG) and by the National Institute of Health under grant R01 GM75297. This publication was made possible with the support of P20RR015588 under the COBRE program of the National Center for Research Resources (NCRR) at the NIH (to ASR). The funders had no role in study design, data collection and analysis, decision to publish, or preparation of the manuscript.

**Competing Interests:** The authors have declared that no competing interests exist.

\* Email: mgriesemer@ucmerced.edu

§ These authors contributed equally to this work.

## Introduction

Protein homeostasis, or proteostasis, is characterized by the integration of biological pathways that modulate protein biogenesis, maturation, transport, and degradation. As a critical element to cell survival, networks of molecular chaperones, foldases, and quality control components minimize the effects of cell stress in order to revert to a homeostatic environment [1]. Proteostasis occurs in distinct subcellular environments and is constantly monitored by stress-signaling pathways. In eukaryotes, the endoplasmic reticulum (ER) is the first membrane-enclosed organelle of the secretory pathway, which ascertains the fidelity of protein folding, maturation, biogenesis (*i.e.* translation and ER translocation), and ER-associated degradation (ERAD). In the yeast *S. cerevisiae*, multiple ER quality control mechanisms have been identified to modulate these critical ER processes, including associated chaperone/co-chaperone interactions. Specifically, molecular chaperones dissociate aggregates, self-associating conglomerations of unfolded and misfolded proteins, which would otherwise interfere with the cell homeostasis leading to cell dysfunction and death [2]. Despite the ubiquitous nature of molecular chaperones, a variety of insults can overwhelm the ER’s processing capacity including nutrient deprivation, pathogenic

infection, cell differentiation, or alterations in calcium concentration or redox status. As a consequence of ER stress, aberrant proteins accumulate within this organelle, triggering intracellular pathways collectively referred to as the unfolded protein response (UPR). In eukaryotes, the UPR transcriptionally up-regulates genes encoding molecular chaperones [3], ERAD machinery [4–7], key enzymes of lipid biosynthesis [8], and other components of the secretory pathway [9–11]. Notably, several key features of the UPR are conserved across eukaryotes; although expanded in scope, the mammalian UPR has similar attributes to that of *S. cerevisiae*, particularly with respect to the Ire1p-dependent regulation of unfolded proteins and BiP modulation of the response (reviewed [12]). The elucidation of these pathways – specifically the interplay between UPR and ERAD – has become of growing importance in therapeutics as loss of proteostasis has been suggested to lead to a number of human diseases including Alzheimer’s, Parkinson’s Disease and Type II Diabetes [13].

In the early secretory pathway, protein fidelity is attributed to select chaperone/co-chaperone interactions (Hsp70 and Hsp40 proteins, respectively) conserved via evolution from yeast to humans. As one of two distinct Hsp70 molecular chaperones in the ER, BiP/Kar2p binds preferentially to hydrophobic residues of nascent or unfolded proteins [14,15]. BiP, the yeast homolog of

### Author Summary

The misfolding of proteins carries important implications for diseases such as Alzheimer's, Parkinson's, cancer, and diabetes. Once misfolded, proteins tend to associate into aggregates that pose a toxic threat to the cell. Chaperones are proteins that rescue the cell from an accumulation of these maladjusted proteins through dissociation of toxic oligomers and proper (re)folding. The endoplasmic reticulum (ER) is an organelle that serves as the staging ground for the chaperone activities of protein transport, folding, and maturation in the early secretory pathway. We have developed a computational model to investigate potential mechanisms that enable multiple ER-resident molecules working in concert to effectively fold peptides and transport nascent proteins across the ER membrane. Although previous models focused on chaperone interactions with peptides, we have explored the influence of cooperativity among chaperone molecules to assist in protein folding and maturation. We found that chaperone cooperation led to a higher yield of folded molecules compared to when chaperones bound to peptides in a 1:1 stoichiometry. We have concluded that the clustering or multiple binding of chaperones may facilitate protein folding *in vivo*.

binding protein immunoglobulin (referred to as Kar2/Grp78 [16]), has been identified as an essential component of ER translocation, protein folding and maturation, karyogamy, and ERAD [17–20]. To facilitate protein folding, co-chaperones stimulate the binding of BiP to substrates whereas nucleotide exchange factors (NEFs) assist in BiP's stochastic release via cycles dependent upon adenosine triphosphate (ATP). For example, co-chaperone Sec63 directly interacts with BiP, increasing its affinity for nascent proteins as they advance through the translocation

pore in *S. cerevisiae* [21–23]. In yeast, the posttranslational translocation of nascent peptides is mediated by a heptameric Sec complex, composed of Sec63, Sec62, as well as the heterotrimer Sec61, which serves as the protein-conducting channel [24,25]. Photo-cross-linking experiments have shown that nascent peptides are in continuous contact with Sec61 during protein translocation [26]. More recently, cryo-electron microscopy established that a single Sec61 heterotrimer enables the progress of nascent proteins across the ER membrane, a conserved feature manifested in both yeast and mammals [27]. In addition to ER translocation, BiP's interaction with co-chaperone Scj1 has been implicated in protein folding and maturation [28,29], and degradation of aberrant proteins [30].

ER translocation, protein folding and maturation, as well as ERAD are conserved mechanisms across eukaryotes. As such, the model eukaryotic organism, *S. cerevisiae*, provides an effective experimental platform to elucidate an improved mechanistic understanding of proteostasis, specifically with regards to ER chaperone/co-chaperone interactions. Proteomic studies have identified absolute levels of protein expression and verified the location of ER-resident proteins [31,32]. These data suggest that the ER-resident chaperone BiP exceeds the level of all co-chaperones in the ER by at least an order of magnitude at conditions of normal growth, and is significantly up-regulated during the UPR [6,33] indicating a significant increase in BiP's total abundance. Furthermore, BiP binds to substrates with varying affinities [14], suggesting BiP responds to the protein's folding requirements. Interestingly, from an experimental perspective, the spatial localization of ER-resident chaperones or co-chaperones has been evaluated for only Sec63 during the process of translocation. In yeast, membrane protein Sec63 must by necessity be localized at the ER membrane in order for nascent proteins to translocate [34]. Collectively, this evidence suggests that BiP's spatiotemporal profile may be a contributing factor to its diversity and functionality in the ER. This hypothesis was

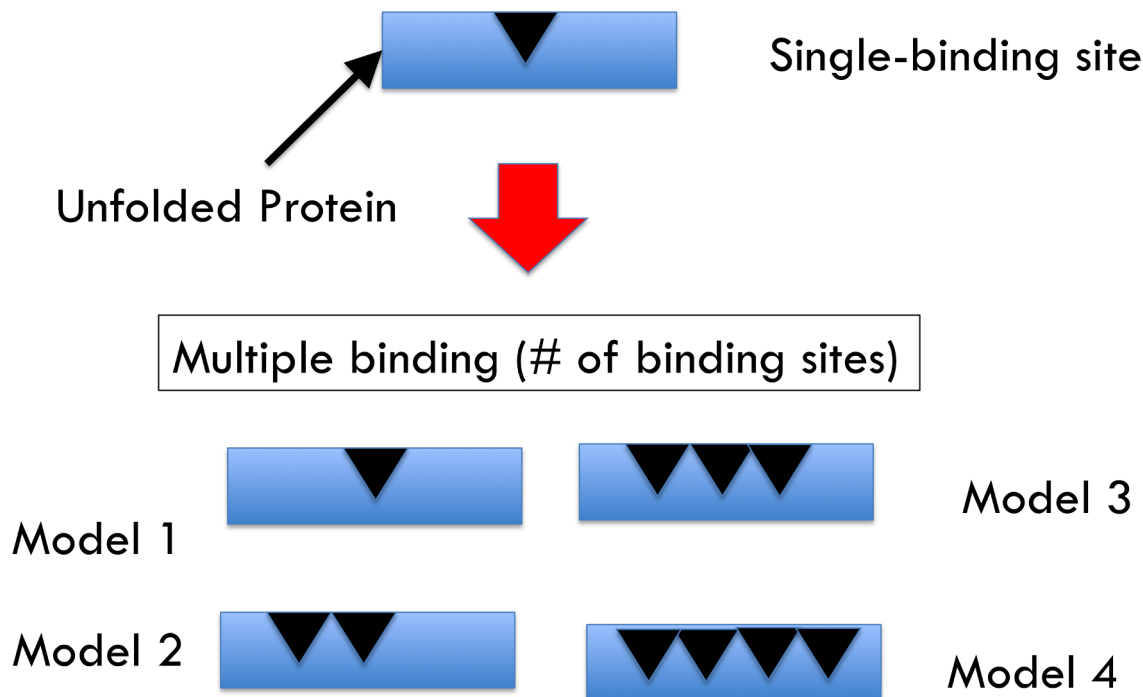

**Figure 1. Models defined by number of binding sites.** Schematic of the 4 models defined by the number of binding sites. doi:10.1371/journal.pcbi.1003675.g001

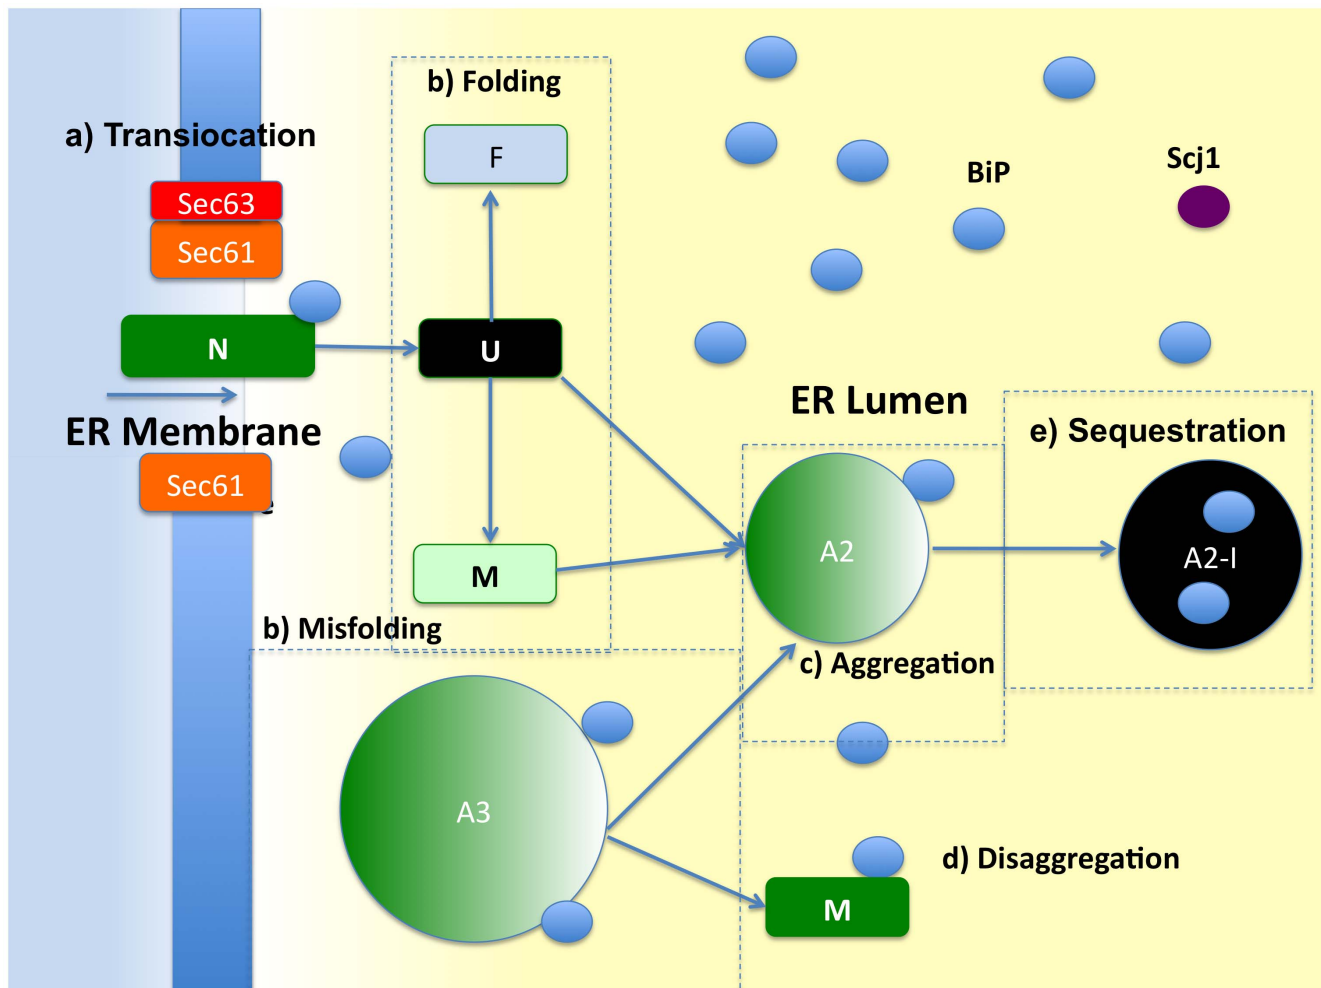

**Figure 2. Schematic of the processes in the ER and their spatial location.** Protein translocation occurs at the ER membrane, while the other processes can occur in the ER lumen. Processes include: (a) translocation; (b) folding/unfolding/misfolding; (c) aggregation; (d) disaggregation; (e) sequestration. Species are represented as follows: nascent protein (N); folded protein (F); unfolded protein (U); misfolded protein (M); BiP; Translocation Pore (Sec61); Sec63; size 2 aggregate (A2); size 3 aggregate (A3); size 4 aggregate (A4).  
doi:10.1371/journal.pcbi.1003675.g002

previously posited and computationally explored [35]. Those results were in agreement with Sec63 experimental results, and further suggested that BiP clusters may exist in order to facilitate the efficient translocation of nascent proteins.

That BiP performs disparate functions owes to its tendency to bind many different types of proteins. Binding of multiple chaperones to unfolded proteins has been established and determined to be kinetically favorable [36]. The transport of nascent proteins into the ER involves many BiP molecules working in concert. Algorithms to predict binding sites have been developed, and there are many examples of proteins that have repeated hydrophobic stretches of amino acids [15,37,38], which predict the presence of multiple binding sites. Aggregates have also been found to have the analogous binding sites [39], while their large size implies that multiple BiP molecules could engage them at individual sites simultaneously. Here, we refer to clustering as the process by which multiple BiP molecules bind to individual binding sites that can be predicted from hydrophobic residues along the length of the protein. This is in contrast to aggregation, where self-associating conglomerations of unfolded and misfolded proteins combine into larger toxic structures.

Experimental evidence has revealed that the refolding of misfolded proteins and aggregates occurs in the presence of a molar excess of chaperones [40], which led investigators to propose that multiple chaperones apply a cooperative stretching force known as entropic pulling [41,42]. The random motion of several bound individual chaperones on a peptide can sum up to an effective unfolding enabling re-initialization of the folding process. The additional molecules provide an inertial brace that stabilizes the interaction between chaperone and protein. In the case of chaperone-mediated disaggregation, the brace is the aggregate itself. A similar mechanism enables chaperones to assist nascent peptides during ER translocation.

Cooperative action underlies many cellular processes including signal transduction [43], protein transport [44], and chemotaxis [45]. In the chaperone system, binding is not cooperatively enhanced. Rather, the rate of solubilization and renaturing of proteins increases with the number of chaperone molecules [40].

In this study, we created a computational model to investigate the extent that an ER-resident chaperone, BiP — spatially localized to “clusters” — may influence the extent of protein folding. Our model includes BiP, the co-chaperones Scj1 and

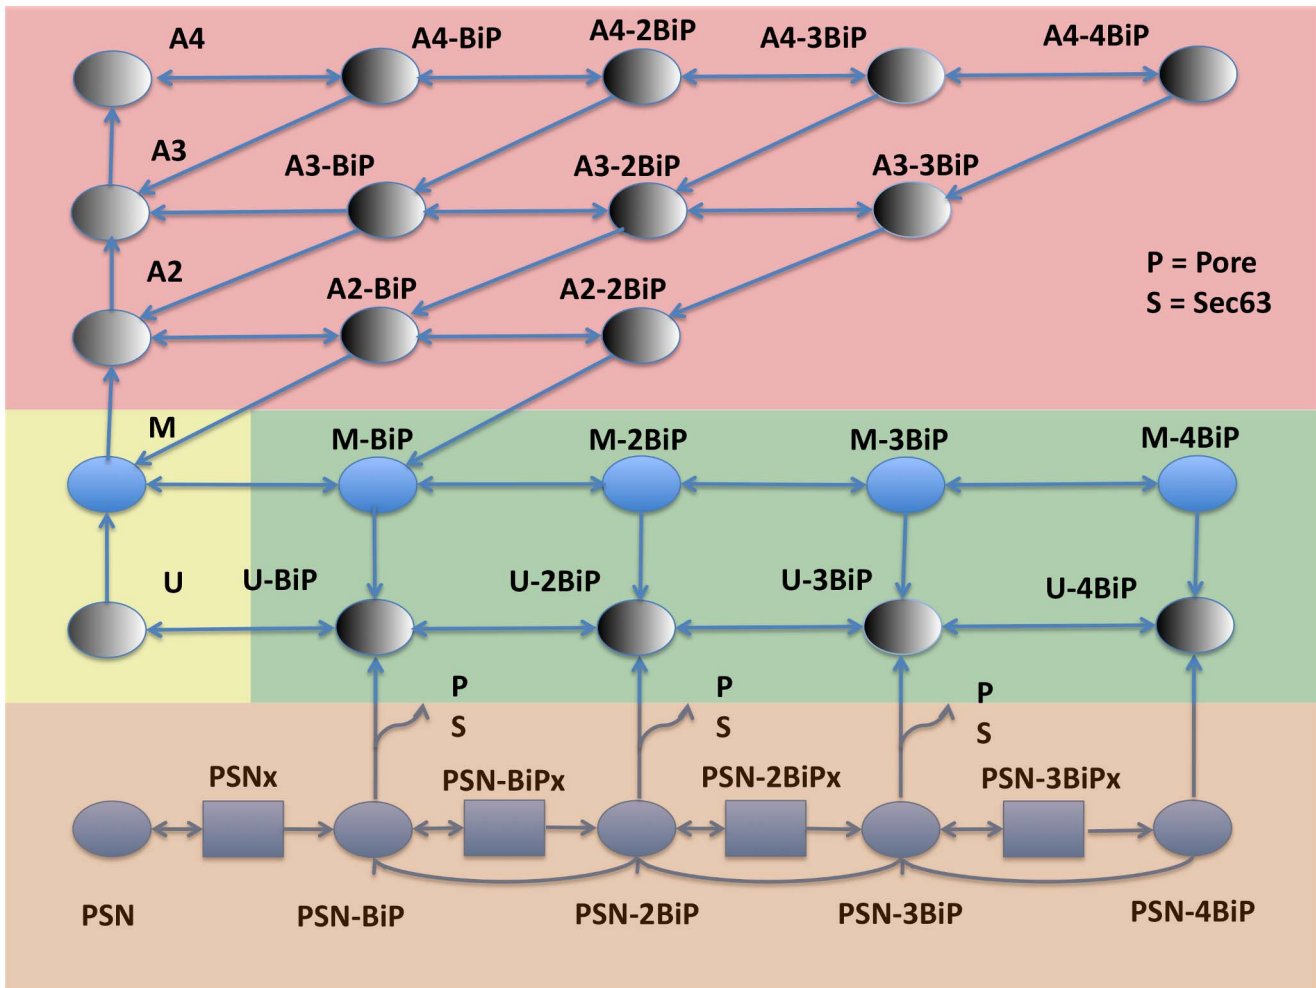

**Figure 3. Schematic of the ODE model.** Background colors represent translocation (orange), unfolding (green), misfolding (yellow), and aggregation/disaggregation (red) modules. Additional states and reactions involving the luminal co-chaperone Scj1 are accounted for in the aggregation, unfolded, and misfolded modules, but are omitted from this diagram due to space limitations. Species are represented as follows: Pore; nascent protein (N), sliding state (x); folded protein (F); unfolded protein (U); misfolded protein (M); BiP; Sec63; size 2 aggregate (A2); size 3 aggregate (A3); size 4 aggregate (A4). Sliding states (x) mimic the movement of the nascent protein further into the lumen. doi:10.1371/journal.pcbi.1003675.g003

Sec63, and multiple states corresponding to unfolded proteins and complexes. This work implements ER-resident chaperone/co-chaperone interactions, experimental insights [21,46–48], estimates of species concentrations determined for *S. cerevisiae* [32], and binding affinities between BiP, Sec63, and synthetic peptides [46,47]. When experimental data were not available, established estimates from the mammalian literature for these highly conserved mechanisms and proteins were used (Text S1, Table S1, Supporting Information). To assess the potential advantages of clusters, this model was used to evaluate the extent to which gradients of BiP molecules may facilitate its activities in protein folding and aggregate disassembly. Previous models [49–59] have included varying aspects of chaperone activities and interactions, yet only accounted for a single binding site scenario; in contrast, our model focuses on multiple binding as the mechanism to facilitate BiP's roles in the ER.

This study provides a detailed analysis of (i) the quantitative impact of chaperone clustering activity in the ER and contributing factors leading to efficient protein folding; and (ii) the potential mechanisms and interplay among components of ER quality control. Together, this framework provides an improved mecha-

nistic understanding of chaperone/co-chaperone interactions, as well as possible strategies to minimize the accumulation of misfolded proteins.

## Models

### Model Description

We created an ordinary differential equation (ODE) model to study the efficiency of protein folding due to the molecular heterogeneity of ER-resident chaperone, BiP. Four sub-models were created that differ by the stoichiometry of binding sites to the protein species: one, two, three, and four (as shown in Figure 1). To evaluate model performance two metrics were accounted for: (i) folding efficiency (*i.e.*, fraction of proteins folded); and (ii) chaperone cost (*e.g.*, the molecular resources needed to achieve a specified level of efficiency). A schematic of the ER, as well as prominent protein-protein interactions, is shown in Figure 2. A total of 60 species and 125 reactions are evident in the largest model. Within a model, numerous states have been depicted in Figure 3. A comprehensive list of all reactions, states, rates and initial conditions is referenced in the

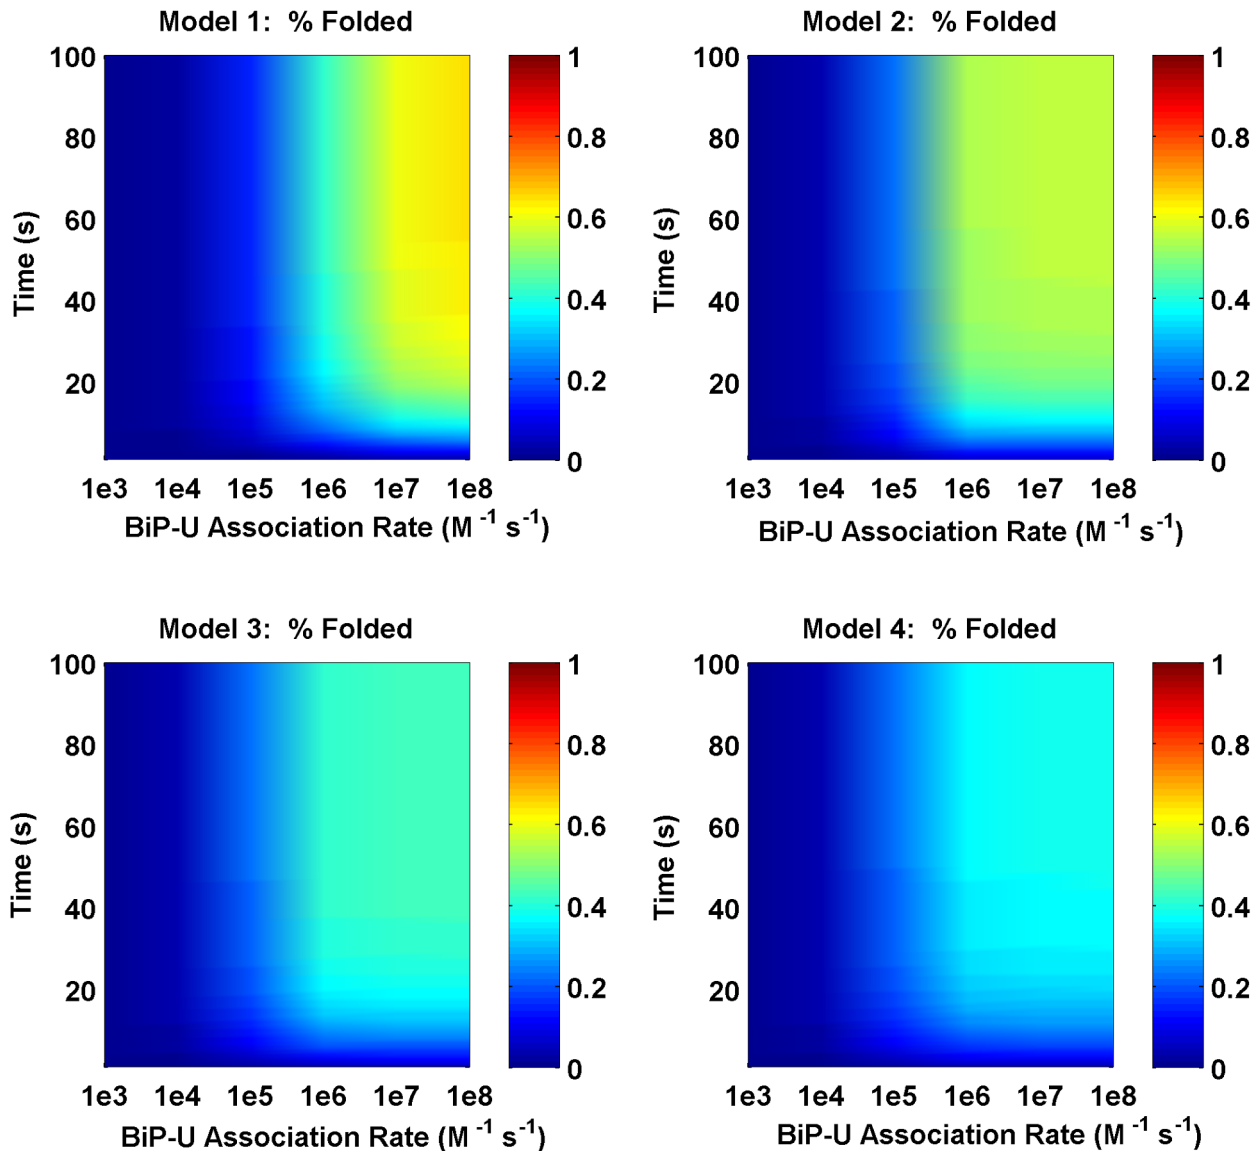

**Figure 4. Folding efficiency vs. BiP binding rate without cooperativity.** Comparison of the folding efficiency (*i.e.* fraction of proteins folded) as a function of the binding rate between BiP and unfolded proteins. In this scenario, there is no cooperative effect among chaperones in folding, unfolding, or disaggregating proteins. The model number refers to the number of binding sites. In this scenario, Model 1 has the highest folding efficiency, followed by Models 2, 3 and 4. doi:10.1371/journal.pcbi.1003675.g004

Supporting Information. The initial units of species abundance were converted to concentration by incorporating an ER volume of  $0.7 \mu\text{m}^3$  [60]. Model parameters were obtained from literature sources (where available), as detailed in the Supporting Information (Text S1, Tables S1–S7).

### Model Structure

Our model monitored the fate of soluble proteins within the ER lumen by investigating the composition of six modules, as follows:

#### 1. Protein Synthesis and Translocation

A nascent protein (N) is synthesized by a ribosome localized on the ER membrane (cytosolic interface) near the translocon, as shown in Figure 2a. Sec61 channels, referred to as translocation pores, are activated by the binding of co-chaperone Sec63, and nascent proteins can then start the process of translocation

through the ER membrane. In this study, we modeled the movement of nascent proteins across the ER membrane as post-translational translocation, which directly involves the Sec complex of eukaryotes. The nascent protein progresses forward into the pore channel (Pore-Sec63-N $\rightarrow$ Pore-Sec63-N $_x$ ), exposing a binding site ( $x$ ) within the lumen where a BiP molecule may bind. We assume that a BiP molecule preferentially binds at a site closest to the membrane, consisting of hydrophobic residues, as the co-chaperone/chaperone interaction facilitates this binding (Pore-Sec63-N $_x$ +BiP $\rightarrow$ Pore-Sec63-N-BiP). Subsequently, a nascent protein can irreversibly proceed into the lumen, thus exposing a second binding site to BiP at the channel; however, it cannot assume the first configuration that consisted of the initial BiP at the membrane, since BiP acts as a “stopper” to prevent this motion. This cycle continues until the nascent protein has completely exited the channel. The nascent

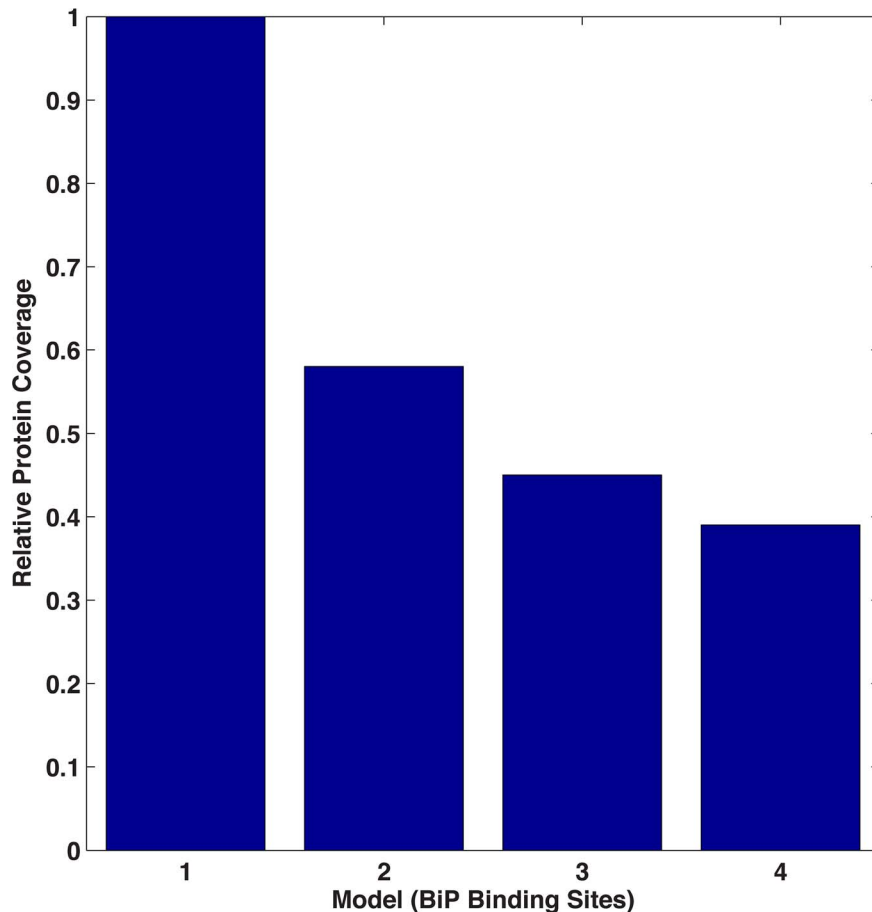

**Figure 5. Relative protein coverage.** Protein coverage of the four models relative to Model 1 in the noncooperative scenario. Coverage refers to the percentage of proteins that are protected from misfolded and aggregation at any one time.  
doi:10.1371/journal.pcbi.1003675.g005

protein then dissociates from the Pore-Sec63 complex and is now classified as an unfolded protein (U), with bound BiP molecules spaced intermittently along the length of the peptide. In this model, the Pore-Sec63 complex disassociates into its constituent proteins, yet whether Sec61 pores are involved in successive rounds of ER translocation is unclear [61–63].

## 2. Misfolding, Unfolding, and Productive Folding

This multifaceted pathway is detailed in Figure 2b. In this scenario, the default initial protein state is unfolded, but may terminally misfold, a circumstance dependent on the ratio of unfolded proteins to chaperones. Misfolded proteins cannot spontaneously progress towards an unfolded state since a key role of chaperone/co-chaperone systems is to bind to misfolded proteins and unfold them, thereby resulting in an opportunity to fold to its proper confirmation. In this model, the mechanism of the chaperone system begins with unfolded or misfolded proteins binding to the J-type co-chaperone Scj1 (analogous to Erj3 in humans) or with BiP forming binary complexes (Scj1:U/M or BiP:U/M, where the “/” indicates “either-or”). BiP binds weakly to substrates while Scj1 accelerates ATP hydrolysis to facilitate BiP’s conformational change, thus an increased affinity between BiP and the unfolded protein. Consequently, BiP and Scj1 may act synergistically. BiP molecules bound to U/M passively prevent misfolding and aggregation (or in the case

of aggregates, further oligomerization). Unfolded proteins fold either spontaneously or by chaperone assistance [64–67].

## 3. Aggregation

Aggregation is illustrated in Figure 2c. Our model describes aggregation as a process in which non-native proteins associate and evolve by the addition of unfolded or misfolded proteins. Aggregation by this process could lead to large masses of hundreds of monomers, which as a model would be intractable computationally. Thus, we limited the size of aggregates to four. Notably, larger aggregates require the assistance of additional ERQC components other than BiP and Scj1 alone [68], limiting applicability here. Each aggregate maintains a number of binding sites up to the size of the aggregate and/or the number of binding sites of the model, whichever is less. Thus, the single binding site model has only one binding site even for a size four aggregate (A4), while the four site model has four binding sites on A4. The rate of accumulation of proteins into aggregates is assumed to be equal for all sizes of aggregates ( $10^7 \text{ M}^{-1} \text{ s}^{-1}$ ), except the first step (nucleation) which was constrained as one-tenth of all sequential steps, thus rate-limiting [69]. We assume that the aggregation is irreversible except through the action of chaperones. To substantiate this assumption, Diamant *et al.* [68] demonstrated that Hsp70 chaperones have a diminished ability to resolubilize very large aggregates by themselves.

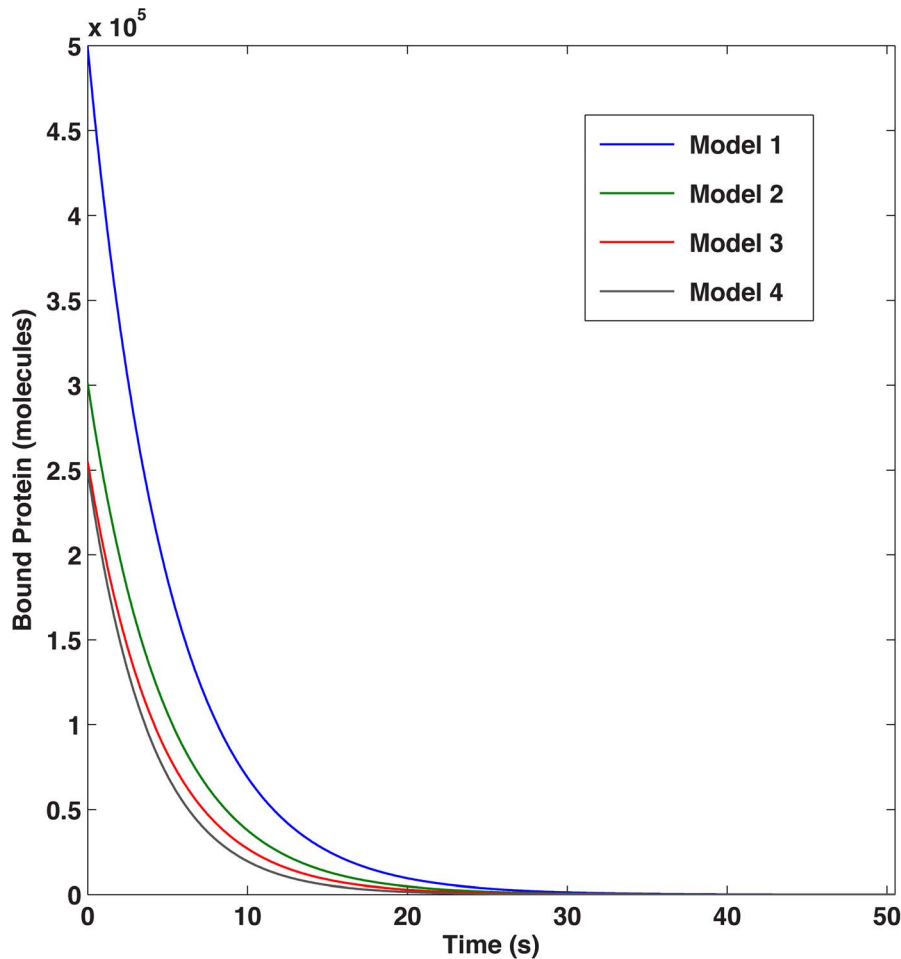

**Figure 6. Protein coverage.** Time series of the amount of bound protein for the different models, showing greater coverage for the single binding site model.

doi:10.1371/journal.pcbi.1003675.g006

#### 4. Disaggregation

Disaggregation is shown in Figure 2d. Disaggregation is critical for the recovery of ER homeostasis following the accumulation of protein aggregates due to classical cell stress responses, such as the heat shock response or UPR. Successful disaggregation leads to a misfolded monomer bound to a single chaperone, while the remaining chaperones and aggregate exist in a complex  $[A_{j-1}-i\text{BiP}]$  where  $j-1$  is the new aggregate size and  $i$  is the number of BiPs still bound to the aggregate. We have assumed that aggregates do not dissociate freely, in the absence of chaperone interactions [70,71]. However, chaperones can extract a constituent misfolded protein from the aggregate, reducing the aggregate size. In an iterative manner, this process yields total disaggregation. Scj1 facilitates BiP's function by binding initially to the aggregate before ATP hydrolysis, thus securing the ER-resident chaperone, BiP, to the substrate [72]. Chaperone/co-chaperone interactions stabilize the aggregate at its current size. As with the folding or triage reactions, BiP can perform disaggregation independent of Scj1, but at a lower binding rate. We set the disaggregation rate to  $1 \text{ s}^{-1}$  for BiP-only mediated reactions.

#### 5. Sequestration

Aggregates can become insoluble, inert bodies (I). We assumed a single rate of irreversible entrapment for all aggregated species. Chaperones are lost, as they become entangled in these

structures and eventually degrade by ERAD. We set this insoluble rate to  $1 \text{ s}^{-1}$  [59]. Figure 2e illustrates this process.

**Cooperativity.** Cooperativity is modeled as entropic pulling, via mass-action reactions, and highlighted in the example reactions below (see Tables S2–S7 in Text S1 for the full description),

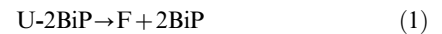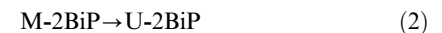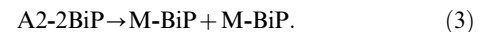

#### Model Metric Equations

In this study we assessed two model metrics: folding efficiency and chaperone cost. The former is given by the total number of folded proteins at the end of the simulation divided by the total number of unfolded proteins (yielding a fractional range between zero and one),

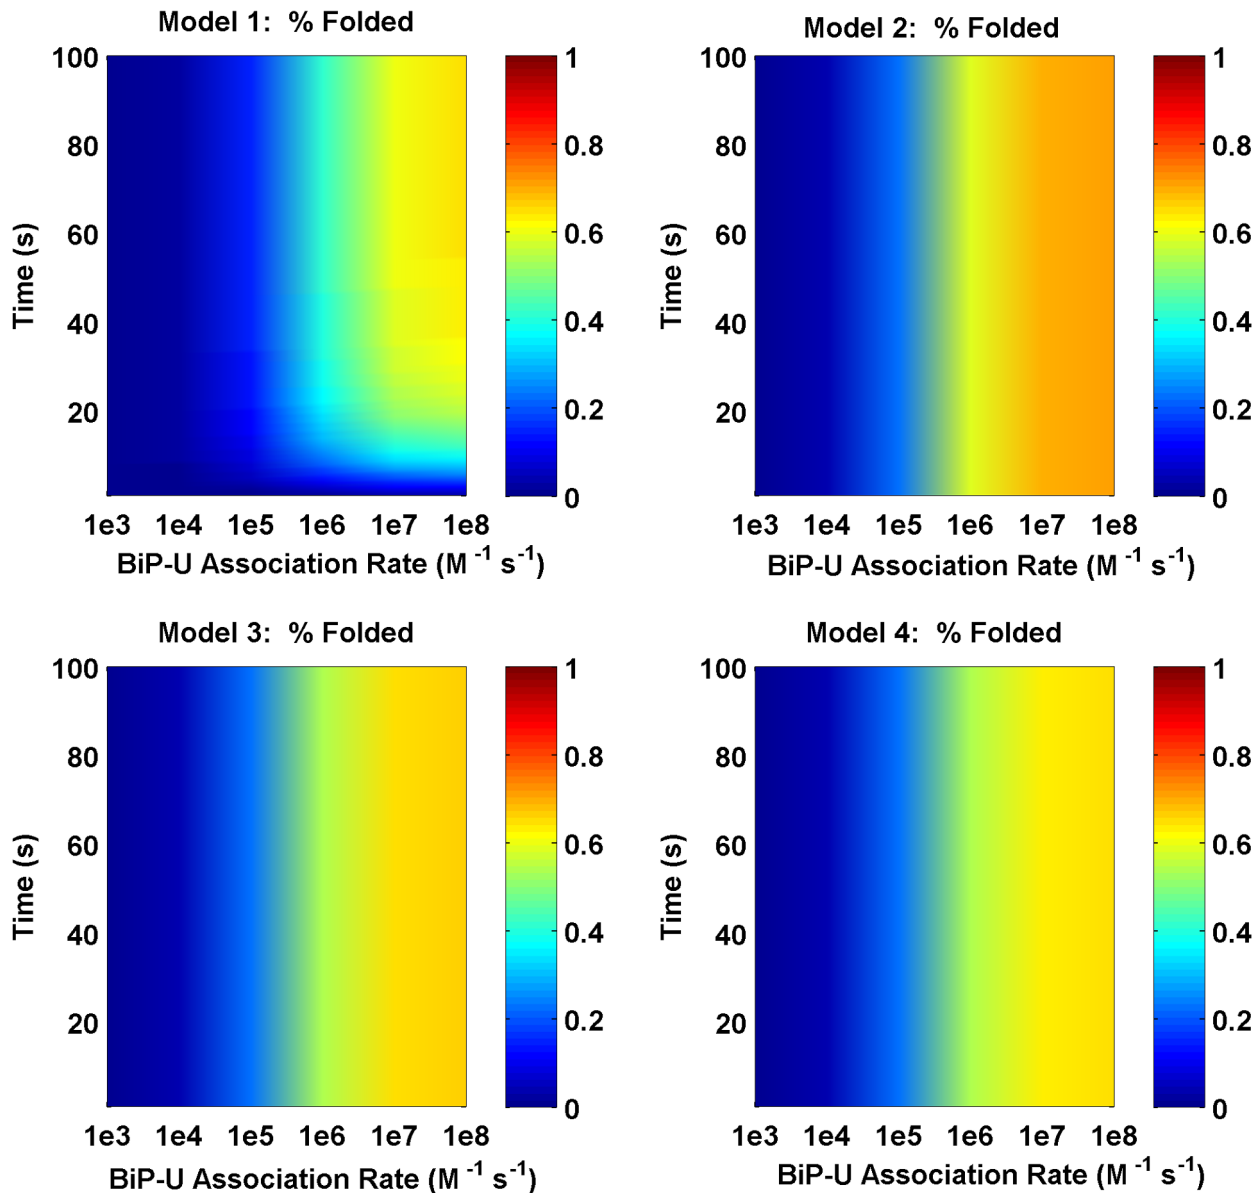

**Figure 7. Folding efficiency vs. BiP binding rate with cooperativity.** Comparison of the folding efficiency (*i.e.* fraction of proteins folded) as a function of the binding rate between BiP and unfolded proteins with a cooperativity factor of  $C = 10$ . In this scenario, Model 2 has the highest folding efficiency. doi:10.1371/journal.pcbi.1003675.g007

$$FE = \frac{F}{U_{total}}. \quad (4)$$

Chaperone cost is defined as the average number of bound chaperones per unfolded protein per unit time. This metric combines the time spent on the protein with the total number of chaperones bound at the end of the simulation,

$$CC = \frac{BiP_{bound}}{dt}. \quad (5)$$

## Results

### Model Results

Steady-state solutions for the four model cases (corresponding to 1, 2, 3 or 4 binding sites) were completed for different values of BiP

association to unfolded proteins. Figure 4 compares the models in terms of folding efficiency (*i.e.*, total folded as a percentage of total protein) and association rate. In the absence of cooperativity, the single binding site model (Model 1) yields increased levels of folded protein, as unfolded protein binding sites are more easily saturated, providing more BiP coverage of the unfolded protein population (Figure 5). When one examines the time of interaction between BiP and unfolded proteins, BiP covers more proteins, each for a longer period of time (in protein per second) as compared to the alternative models (Figure 6). This effect occurs at low ratios of BiP:U, hence the chaperone is classified as a ‘holdase’ [73]. However, the simpler non-cooperative models are incomplete in describing the entropic pulling data [40], hinting that multiple BiPs must also act as a cooperative ‘unfoldase’, in line with previous observations [73].

In comparison to other models herein, the degree of folding in the single binding site model is more highly dependent on the



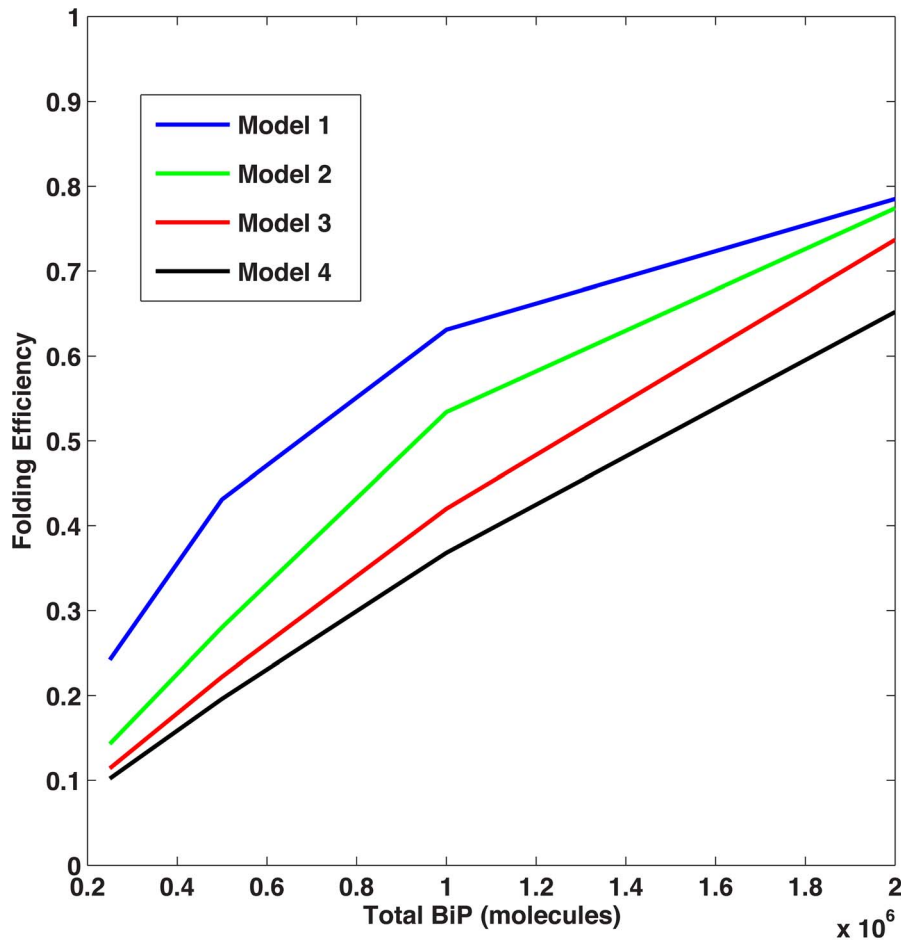

**Figure 8. Folding efficiency vs. cooperativity.** Folding efficiency of the four models as a function of the cooperativity factor. doi:10.1371/journal.pcbi.1003675.g008

association rate (Figure 4). Multiple BiP binding events minimize the potential of an unfolded protein towards either misfolding or aggregation pathways, as a consequence of redundant binding events. We have not accounted for ATP molecules in our simulations, since this aspect would only be of concern in a depleted ATP environment [70].

In line with the entropic pulling contributing to BiP function, we increased the rates of folding, unfolding, and disaggregation by a factor of  $C$ , to reflect the cooperativity of multiple chaperones participating in these select intracellular activities. With  $C = 10$  (e.g., the lower end of the range (1–100) reported in the literature [41]), Model 2 resulted in the highest level of folded protein. Less folding was observed in Models 3 and 4 as compared to Model 2 since coverage competes with cooperativity (Figure 7). When cooperativity is implemented, the folding efficiency for Models 2, 3, and 4 increases; Model 2 performs optimally for  $C > 5$ , as shown in Figure 8.

We then varied the concentrations of total BiP and unfolded protein to examine the effect on the two metrics described previously. As expected, increased concentrations of BiP led to higher levels of folding and less aggregation. Unexpectedly, we discovered that the ratio of BiP:U is a more important factor than the concentrations of either species alone. In the noncooperative scenario, Model 1 produced the most folding (Figure 9); however, when cooperativity was added, Models 2–4 attained higher folding

efficiencies (Figure 10). These results suggest that when the BiP:U ratio is low (e.g., conditions of ER stress), cooperativity provides an advantage for multiple binding. At higher BiP concentrations (i.e., relative to the concentration of U), cooperativity became a factor of less importance since the majority of unfolded proteins were protected from aggregation. As a result, more binding sites were occupied, leading to an equalization in the total amount of folding among the four models, i.e. the cooperativity effect was less pronounced.

Figure 11 shows that chaperone cost (i.e., average chaperones bound per second compared to unfolded, misfolded and aggregated proteins) decreased substantially for Models 2, 3 and 4 in comparison with Model 1, as shown for the cooperative case. In general, it is better to maintain a lower cost metric resulting in fewer chaperones bound per second. Due to the faster rates of disaggregation, unfolding, and folding in the cooperative scenario for Models 2, 3 and 4, chaperones maintained a shorter interaction with proteins. More chaperones were engaged with a single protein in Models 2–4, yet this result was counteracted by decreased time that chaperones were bound to the protein.

#### Parameter Correlation Study

To investigate the correlation between parameters and folding efficiency for the different models and cooperativity scenarios, a heatmap is shown in Figure 12. In this study, we varied BiP's

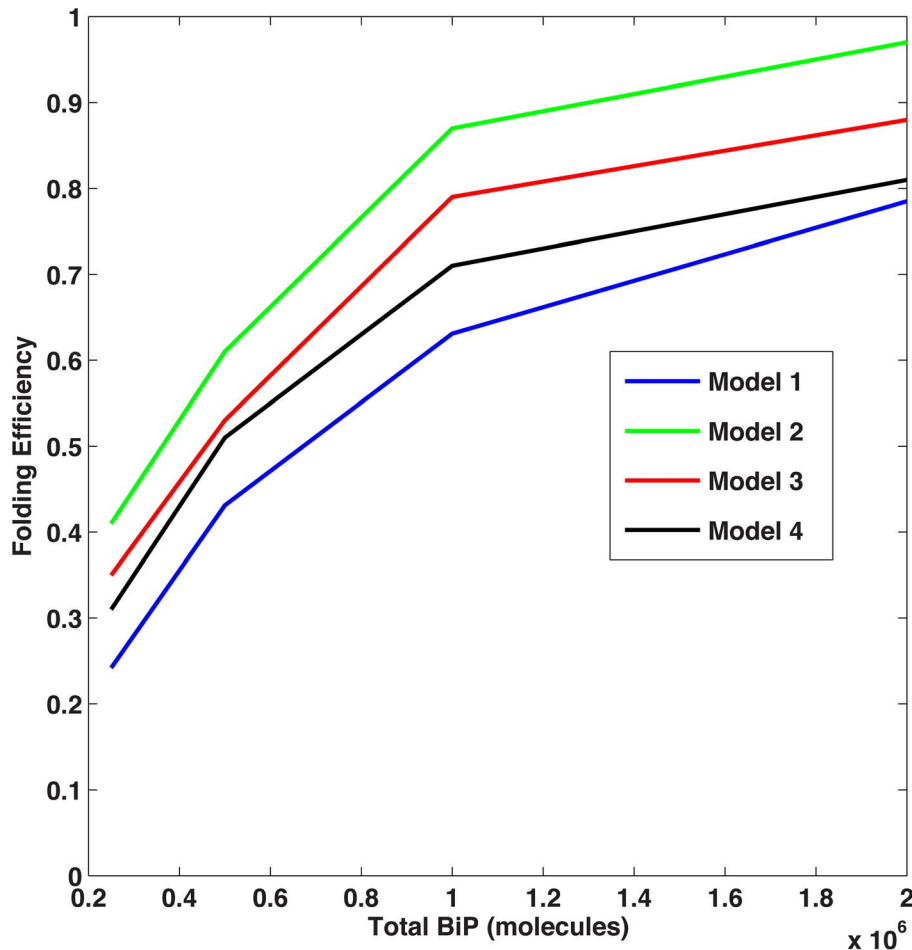

**Figure 9. Folding efficiency vs. number of BiP molecules.** Comparison of the folding efficiency as a function of the number of BiP molecules with no cooperativity and  $U = 1.0 \cdot 10^6$  molecules. In this scenario, Model 1 folds most efficiently. doi:10.1371/journal.pcbi.1003675.g009

association rate, the aggregation rate from  $10^3$  to  $10^8 \text{ M}^{-1} \text{ s}^{-1}$  and varied the folding, unfolding, misfolding, BiP disassociation, and sequestering rates from  $10^2$  to  $10^{-3} \text{ s}$ . Over these six orders of magnitude, the folding efficiencies were recorded then correlations were completed between parameter ranges and folding efficiencies. Note: this analysis varied one parameter at a time, while keeping the others constant.

1. The BiP-U association rate has a positive correlation with the folding efficiency of 0.5–0.6 for all models and cooperativities. Thus, although the folding efficiencies are different for the four models and cooperativity scenarios, the increases in efficiency are proportional to each other. The recruitment of BiP to proteins is also enhanced by the co-chaperone Scj1 interactions. The medium correlation most likely occurs as a consequence of minimal BiP molecules bound to a fraction of unfolded proteins, *i.e.* the coverage effect.
2. The BiP-U disassociation rate is highly anti-correlated with the folding efficiency ( $\sim -0.99$ ). When the disassociation rate is low, BiP remains bound to the protein (or aggregate), thus allowing for additional time for triage and ultimately folding.
3. The aggregation rate is negatively correlated with the folding efficiency for all models and scenarios. This effect is directly dependent upon folding and aggregation, processes that are in kinetic competition.
4. For the non-cooperative scenario, the unfolding rate is uncorrelated with the folding efficiency across six orders of magnitude. In contrast, chaperones increasingly impact unfolding and maintain a positive correlation with respect to folding yield, within the cooperative scenarios. Since chaperones are involved, the BiP-U association and disassociation rates influence the yield to a greater extent, with the cooperativity factor tipping the balance towards higher levels of folding.
5. The misfolding rate is uncorrelated with all folding efficiencies across models and cooperativity scenarios equal in folding yield. We hypothesized that these results are due to the presence of chaperones on unfolded proteins that prevent misfolding; similarly, misfolded proteins that are extracted from aggregates are stabilized by a chaperone.
6. The folding rate is correlated positively with increasing folding efficiency, although the correlation is not 1.

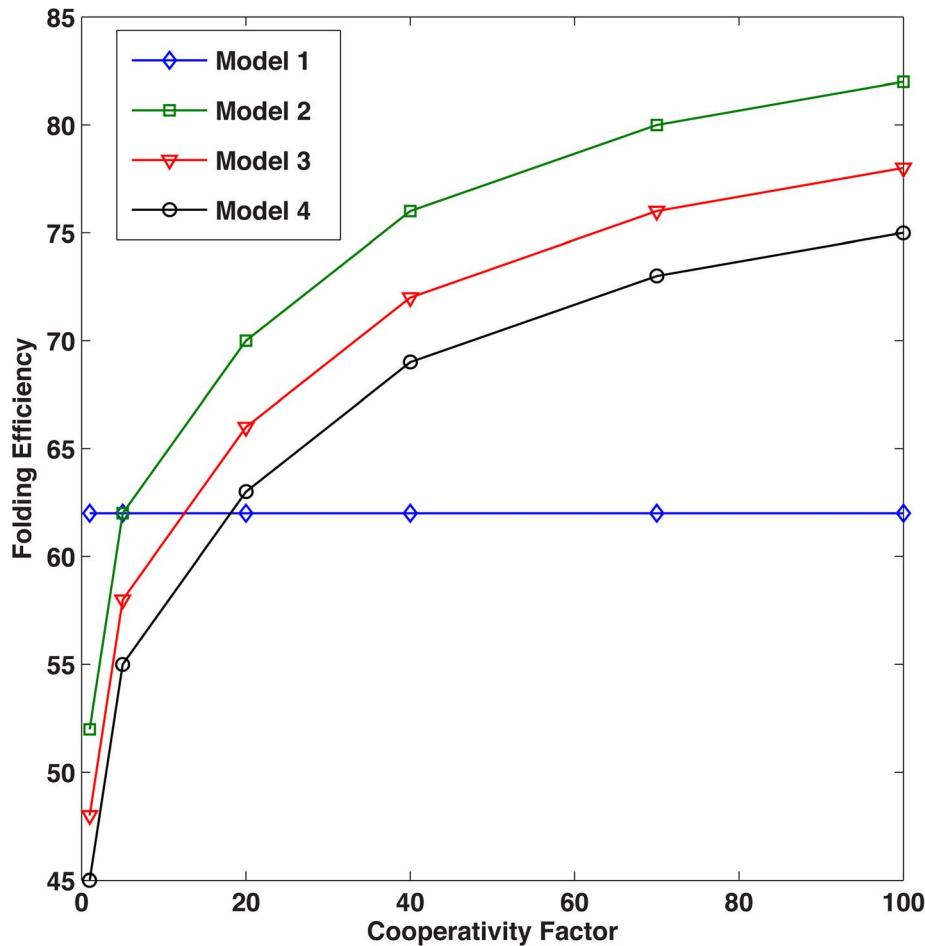

**Figure 10. Folding efficiency vs. number of BiP molecules, cooperative scenario.** Folding efficiency of the four models as a function of BiP concentration with cooperativity factor  $C=10$ . In this scenario, Model 2 folds most efficiently. doi:10.1371/journal.pcbi.1003675.g010

7. The sequestration rate is correlated negatively with folding efficiency. This result is due to two effects: (i) the loss of proteins into these insoluble structures that are not available for folding; and (ii) the entrapment of chaperones that results in lower BiP concentrations, which also has a negative effect on folding yields.

In addition to the single parameter study, we performed a variance-based global sensitivity analysis, in which we varied seven parameters (the BiP association rate, the BiP dissociation rate, the aggregation rate, the unfolding rate, the misfolding rate, the folding rate, and the sequestration rate) over two orders of magnitude simultaneously, and produced 100,000 parameter sets as input to the seven models (four non-cooperative and three cooperative models). We ran each simulation to steady state and recorded the metrics of folding efficiency and chaperone cost. From the variance-based global sensitivity analysis we learned that the sequestration rate and the aggregation rate were the dominant contributors to the variance of the output. However the variance was quite small. Our graphs then revealed for all seven parameters that the output mean across regions of parameter space was essentially constant within a model. This remarkable result indicates that the model output is rather invariant to changes in parameters. Instead our results show that model

structure (the number of binding sites) and the cooperativity factor play a critical role in the behavior of the models. In addition, we also varied the concentrations of BiP and unfolded protein (U). All of these results are in Text S2, the Global Sensitivity Analysis Supplement.

### Translocation

Finally, a translocation scenario was implemented to evaluate the impact of BiP clustering in a dynamic environment. In five different scenarios, a protein flux of 10, 100, 1000, 10000, and 100000 molecules per second was added to the ER [74] over a period of 100 seconds. Thus, many more molecules transverse the membrane to enter the ER lumen, with  $10^6$  molecules initially localized in the lumen as in the steady-state case. This approach was used to mimic general ER stress in yeast. We determined that the translocation flux is highly negatively correlated ( $-0.96$  to  $-0.99$ ) with folding efficiency (Figure 13). This result was expected; as the protein flux increases, nascent proteins accumulate at the cytosol/ER membrane interface due to the limited number of pore complexes while BiP preferentially localized to ER the membrane as compared to the lumen. In the non-cooperative model, Model 1 has the highest efficiency due to the coverage effect. When cooperativity is accounted for, the multiple binding models yield a higher folding efficiency. If no unfolded proteins exist in the

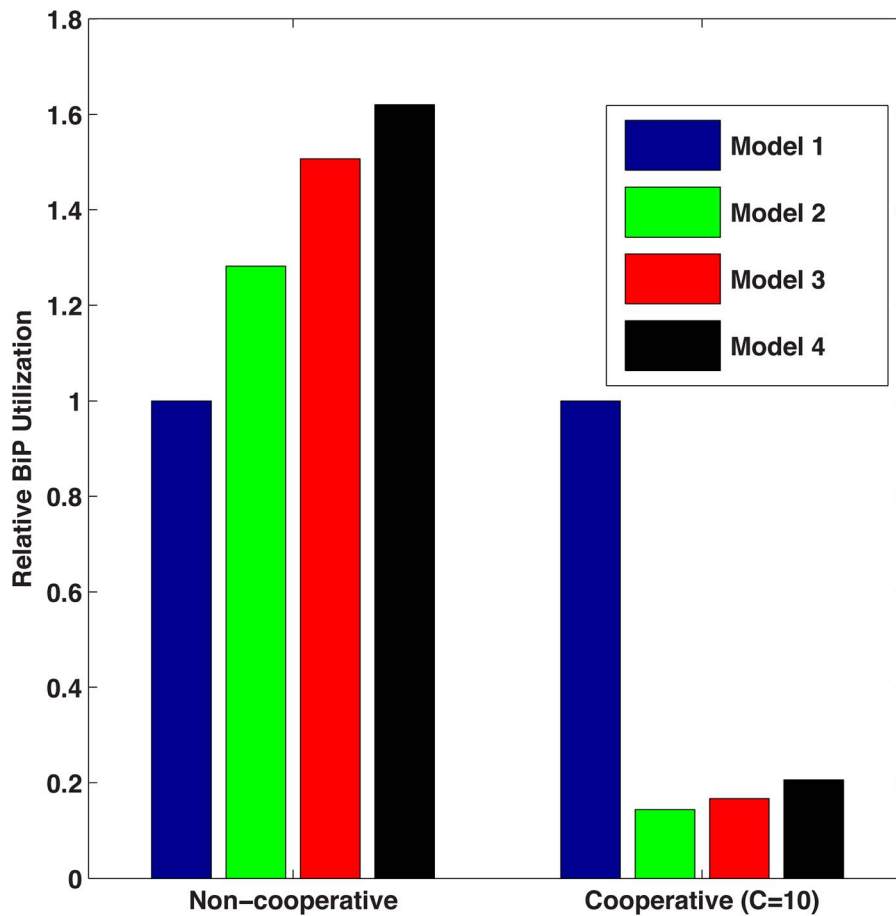

**Figure 11. Chaperone cost.** Comparison of the BiP cost of the four models for both non-cooperative and cooperative scenarios. It is better to have lower chaperone cost so that fewer chaperones are required.  
doi:10.1371/journal.pcbi.1003675.g011

lumen, initially most proteins are protected and the folding efficiency is close to 1 (simulation data not shown).

## Discussion

The chaperone BiP participates in many critical ER processes, including translocation, protein folding, disaggregation, and degradation. To elucidate an improved mechanistic understanding of ER proteostasis, we constructed a computational model to evaluate ER-resident chaperone/co-chaperone interactions in which multiple BiP molecules interact with nascent and unfolded proteins to facilitate protein folding and maturation. In contrast to established models that focused only on a single site for chaperone binding events, we modeled the mechanism of entropic pulling, in which several chaperones operate in concert to unfold and disaggregate peptides by incorporating a stretching force caused by random motions of the individual chaperones. In order to investigate the acceleration of nascent proteins across an organelle membrane, entropic pulling unifies aspects of both the Brownian ratchet model [61] and power stroke model [75,76] exceedingly well. In *S. cerevisiae*, entropic pulling was implemented successfully to track chaperone interactions during mitochondria translocation and to assess nascent proteins and aggregates [41]. Our model that incorporates this synergy represents a progress towards a mechanistic understanding of chaperone interactions.

Protein aggregation was modeled as a separate module to monitor protein fate during simulations. Results indicated that most unfolded and aggregated proteins carried out a transient interaction with chaperone molecules. Despite the stochastic binding events between BiP and unfolded proteins, the sequestration of aggregates can entrap chaperone molecules leading to decreased chaperone levels. The comparison of BiP-protein interactions, in terms of folding efficiency and levels of chaperone cost, was quantified for models containing divergent numbers of binding sites. Our results indicate that for a given concentration of BiP and proteins (*i.e.*, nascent, unfolded, or misfolded), single binding site models provided the highest degree of BiP coverage. However, experimental evidence previously showed that multiple chaperone molecules can work in concert to increase protein refolding and remove aggregates *in vivo*. Furthermore, our model revealed that the BiP-protein interaction provides additional advantages, such that multiple bound BiP molecules *prevent* misfolding of U.

Given the parameter uncertainty, we conducted a study that varied seven parameters (Figure 12) in order to examine the effects of folding efficiency in the system. Initially, each parameter was individually altered, as a global search required many sets and covered only a fraction of the parameter space. We observed that some parameters were positively correlated with folding efficiency and others were negatively correlated. The strongest effect came

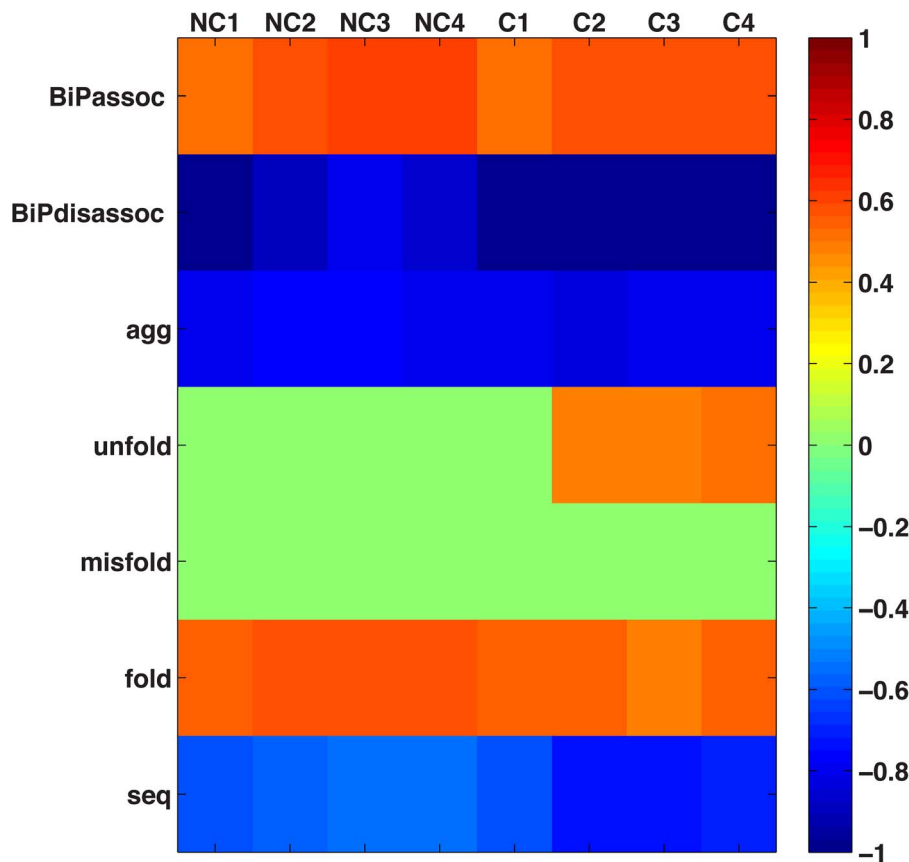

**Figure 12. Parameter map.** Map of the parameter study identifies effects of varying 7 parameters with respect to protein folding efficiency. doi:10.1371/journal.pcbi.1003675.g012

from the disassociation rate of BiP from unfolded proteins, because the longer the BiP could stay bound, the greater chance that folding could occur. Note: this analysis varied one parameter at a time, while keeping the others constant. Global sensitivity analysis, where all parameters were varied simultaneously, is found in the *Global Sensitivity Analysis Supplement*, Text S2.

Due to the highly conserved features between the model eukaryote, *S. cerevisiae*, and mammalian protein-folding machinery, it is extremely likely that these findings for ER translocation and protein-folding events will translate to higher eukaryotes including humans. In fact, mammalian BiP (Grp78) appears to have two functions in protein translocation: (i) it is involved in the insertion of nascent proteins into the Sec61 complex or opening of the pore itself [77,78], and (ii) it binds to the nascent protein that laterally advances through the channel, in a manner similar to a molecular ratchet that facilitates translocation [79–81]. Recently, experimental studies of the mammalian homolog of the Sec complex – co-chaperone Sec63 in yeast – has been shown to recruit BiP to the translocon (*i.e.* Sec61) and activates BiP for interaction with its substrates [82], analogous to the BiP's recruitment to the translocon in yeast, as described previously. The function of many subunits of the Sec complex in mammalian cells has remained elusive due to limited experimental assessments; however, recent progress has begun to elucidate translocation efficiency, gating kinetics and functional profiling, and transport effects of subunits that comprise the mammalian Sec complex [83–85].

Developing spatially-relevant computational models is important as *in vivo* experiments, such as single particle tracking (SPT) and

super-resolution fluorescence imaging techniques used to capture spatial effects at nanometer resolution, are relatively new technologies [86,87]. Interestingly, under conditions of cell homeostasis BiP has been found to distribute heterogeneously throughout the yeast ER, as depicted by live cell imaging and immunofluorescence techniques [23]. In a similar manner, we conducted fluorescence spectroscopy experiments to quantify the extent that BiP gradients exist within the ER lumen (unpublished data). Under conditions of ER stress, a greater degree of BiP clustering was observed. The spatial heterogeneity of BiP is displayed via live cell imaging; in contrast, the translocation pore composed of Sec61 is distributed homogeneously within the ER membrane (Figure S1, Supporting Information). Via computationally intensive efforts, and only through providing cooperative action do the advantages of clustering become evident, providing a mechanistic context for the observed differences.

In conclusion, the chaperone BiP plays several roles in the ER, namely translocation, protein folding, ER-associated degradation, and modulation of the UPR. All of these functions require that BiP perform multiple tasks to complete the process. In translocation, the accepted model is that of a Brownian ratchet, in which multiple BiP molecules bind to nascent proteins to transport them into the lumen [62,63]. BiP's attempt to correctly fold aberrant proteins often takes multiple cycles of binding and release. We show that multiple binding facilitates aggregate dismantling through more coverage on the structures' large surfaces. In addition, our model suggests that the clustering of BiP molecules would be beneficial in terms of efficiency and chaperone cost during protein-folding processes in the ER.

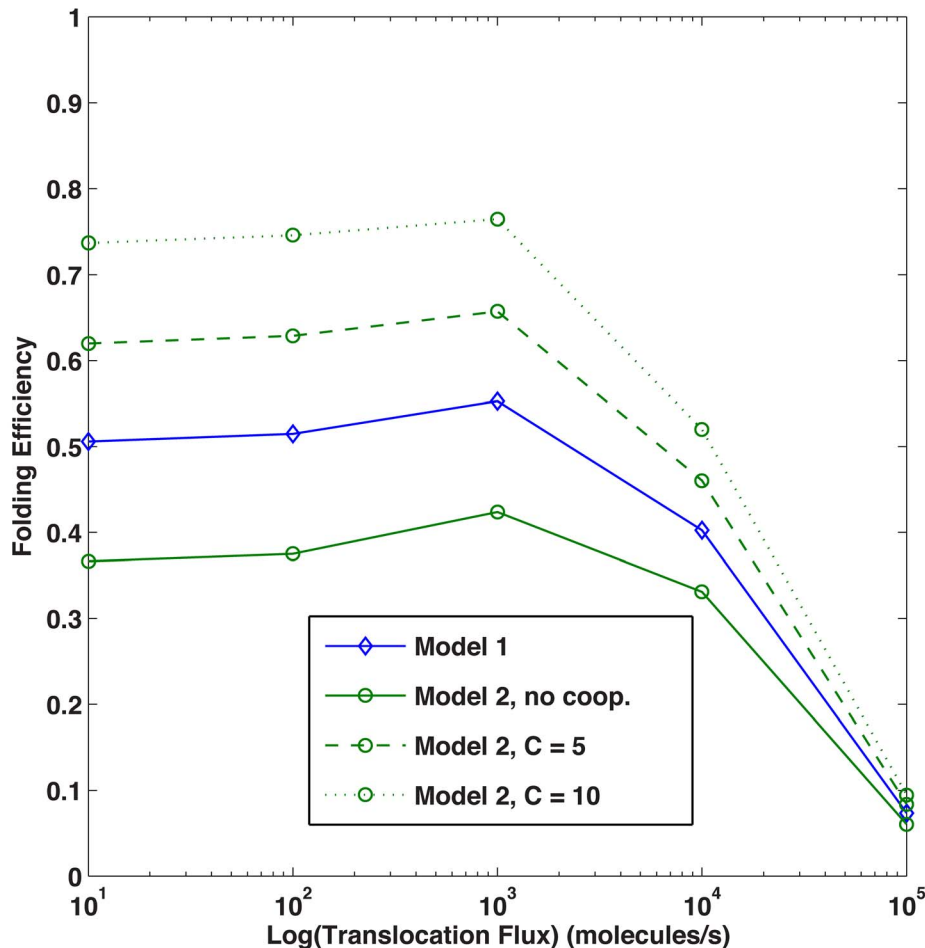

**Figure 13. Folding efficiency vs. translocation rate.** Folding efficiency as a function of translocation flux. doi:10.1371/journal.pcbi.1003675.g013

## Supporting Information

**Figure S1** Spatial effects of BiP and Sec61 identified by live-cell imaging. Fluorescent protein variants (*i.e.* mCherry and yEmCitrine, respectively) were fused in-frame to the C-termini of BiP and Sec61. These recombinant proteins were expressed simultaneously in haploid *S. cerevisiae* cells under the control of their endogenous promoters, as described previously [23,88]. (A) ER-resident molecular chaperone, BiP, is localized to the nuclear and peripheral ER subcompartments. Arrows depict the heterogeneity of BiP distributed throughout the lumen, specifically within the nuclear ER. (B) In contrast, Sec61 appears to be homogeneously localized within the nuclear ER membrane, when assessed in identical cells. (C) DIC image and scale bar of 5 microns. Image

was acquired by confocal microscopy (Zeiss 780 confocal microscopy, 100 $\times$ /NA 1.46). (TIF)

**Text S1** Species and reactions supplement. (PDF)

**Text S2** Global sensitivity analysis supplement. (PDF)

## Author Contributions

Conceived and designed the experiments: MG CY ASR. Performed the experiments: MG CY. Analyzed the data: MG LP. Wrote the paper: MG CY ASR LP.

## References

- Hartl FU (1996) Molecular chaperones in cellular protein folding. *Nature* 381 (6583): 571–579.
- Soto C (2003) Unfolding the role of protein misfolding in neurodegenerative diseases. *Nat Rev Neurosci* 4: 49–60.
- Kozutsumi Y, Segal M, Normington K, Geithing MJ, Sambrook J (1988) The presence of malformed proteins in the endoplasmic reticulum signals the induction of glucose-regulated proteins. *Nature* 332 (6163): 462–464.
- Biederer T, Volkwein C, Sommer T (1996) Degradation of subunits of the Sec61p complex, an integral component of the ER membrane, by the ubiquitin-proteasome pathway. *EMBO J* 15(9): 2069–2076.
- Meusser B, Hirsch C, Jarosch E, Sommer T (2005) ERAD: the long road to destruction. *Nat Cell Biol* 7 (8): 766–772.
- Travers KJ, Patil CK, Wodicka L, Lockhart DJ, Weissman JS, et al. (2000) Functional and genomic analyses reveal an essential coordination between the unfolded protein response and ER-associated degradation. *Cell* 101 (3): 249–258.
- Hiller MM, Finger A, Schweiger M, Wolf DH (1996) ER Degradation of a Misfolded Luminal Protein by the Cytosolic Ubiquitin-Proteasome Pathway. *Science* 273 (5282): 1725–1728.
- Cox JS, Chapman RE, Walter P (1997) The unfolded protein response coordinates the production of endoplasmic reticulum protein and endoplasmic reticulum membrane. *Mol Biol Cell* 8 (9): 1805–1814.
- Ng DT, Spear ED, Walter P (2000) The unfolded protein response regulates multiple aspects of secretory and membrane protein biogenesis and endoplasmic reticulum quality control. *J Cell Biol* 150 (1): 77–88.

10. Travers KJ, Patil CK, Wodicka L, Lockhart DJ, Weissman JS, et al. (2000) Functional and genomic analyses reveal an essential coordination between the unfolded protein response and ER-associated degradation. *Cell* 101 (3): 249–258.
11. Urano F, Wang F, Bertolotti A, Zhang Y, Chung P, et al. (2000) Coupling of stress in the ER to activation of JNK protein kinases by transmembrane protein kinase IRE1. *Science* 287 (5453): 664–666.
12. Mori K (2009) Signalling pathways in the unfolded protein response: development from yeast to mammals. *J Biochem* 146 (6): 743–750.
13. Marciniak SJ and Ron D (2006) Endoplasmic reticulum stress signaling in disease. *Physiol Rev* 86 (4): 1133–1149.
14. Flynn GC, Pohl J, Flocco MT, Rothman JT (1991) Peptide-binding specificity of the molecular chaperone BiP. *Nature* 353 (6346): 726–730.
15. Blond-Elguindi S, Cwirla SE, Dower WJ, Lipshitz RJ, Sprang SR, et al. (1993) Affinity panning of a library of peptides displayed on bacteriophages reveals the binding specificity of BiP. *Cell* 75 (4): 717–728.
16. Rose MD, Misra LM, Vogel JP (1989) KAR2, a karyogamy gene, is the yeast homolog of the mammalian BiP/GRP78 gene. *Cell* 57 (7): 1211–1221.
17. Latterich M and Schekman R (1994) The karyogamy gene KAR2 and novel proteins are required for ER-membrane fusion. *Cell* 78 (1): 87–98.
18. McCracken AA and Brodsky JL (2003) Evolving questions and paradigm shifts in endoplasmic-reticulum-associated degradation (ERAD). *Bioessays* 25 (9): 868–877.
19. Nishikawa S and Endo T (1997) The yeast JEM1p is a DnaJ-like protein of the endoplasmic reticulum membrane required for nuclear fusion. *J Biol Chem* 272 (20): 12889–12892.
20. Tsai B, Yihong Y, Rapoport TA (2002) Retro-translocation of proteins from the endoplasmic reticulum into the cytosol. *Nat Rev Mol Cell Biol* 3 (4): 246–255.
21. Lyman SK and Schekman R (1995) Interaction between BiP and Sec63p is required for the completion of protein translocation into the ER of *Saccharomyces cerevisiae*. *J Cell Biol* 131 (5): 1163–1171.
22. Seidmore MA, Okamura HH, Rose MD (1993) Genetic interactions between KAR2 and SEC63, encoding eukaryotic homologues of DnaK and DnaJ in the endoplasmic reticulum. *Mol Biol Cell* 4 (11): 1145–1159.
23. Young CL, Raden DL, Robinson AS (2013) Analysis of ER resident proteins in *Saccharomyces cerevisiae*: implementation of H/KDEL retrieval sequences. *Traffic* 14 (4): 365–381.
24. Deshaies RJ, Sanders SL, Feldhelm DA, Schekman R (1991) Assembly of yeast Sec proteins involved in translocation into the endoplasmic reticulum into a membrane-bound multisubunit complex. *Nature* 349 (6312): 806–808.
25. Panzner S, Dreier L, Hartmann E, Kostka S, Rapoport TA (1995) Posttranslational protein transport in yeast reconstituted with a purified complex of Sec proteins and Kar2p. *Cell* 81 (4): 561–570.
26. Mothes W, Prehn S, Rapoport TA (1994) Systematic probing of the environment of a translocating secretory protein during translocation through the ER membrane. *EMBO J* 13 (17): 3973–3982.
27. Becker T, Jarasch A, Armarche J-P, Funes S, Jossinet, et al. (2009) Structure of monomeric yeast and mammalian Sec61 complexes interacting with the translating ribosome. *Science* 326 (5958): 1369–1373.
28. Schlenstedt G, Harris S, Risse B, Lill R, Silver PA (1995) A yeast DnaJ homologue, Scj1p, can function in the endoplasmic reticulum with BiP/Kar2p via a conserved domain that specifies interactions with Hsp70s. *J Cell Biol* 129 (4): 979–988.
29. Silberstein S, Schlenstedt G, Silver PA, Gilmore R (1998) A role for the DnaJ homologue Scj1p in protein folding in the yeast endoplasmic reticulum. *J Cell Biol* 143 (4): 921–933.
30. Nishikawa S-I, Fewell SW, Kato Y, Brodsky JL, Endo T (2001) Molecular chaperones in the yeast endoplasmic reticulum maintain the solubility of proteins for retrotranslocation and degradation. *J Cell Biol* 153 (5): 1061–1070.
31. Huh WK, Falvo JV, Gerke LC, Carroll AS, Howson RW, et al. (2003) Global analysis of protein localization in budding yeast. *Nature* 425 (6959): 686–691.
32. Ghaemmaghami S, Huh WK, Bower K, Howson RW, Belle A, et al. (2003) Global analysis of protein expression in yeast. *Nature* 425 (6959): 737–741.
33. Mager WH and Ferreira PM (1993) Stress response of yeast. *Biochem J* 290 (Pt 1): 1–13.
34. Corsi AK and Schekman R (1997) The luminal domain of Sec63p stimulates the ATPase activity of BiP and mediates BiP recruitment to the translocon in *Saccharomyces cerevisiae*. *J Cell Biol* 137 (7): 1483–1493.
35. Griesemer M, Young C, Robinson A, Petzold L (2012) Spatial localisation of chaperone distribution in the endoplasmic reticulum of yeast. *IET Systems Biology* 6 (2): 9.
36. Laufen T, Mayer MP, Beisel C, Klostermeier D, Mogk A, et al. (1999) Mechanism of regulation of Hsp70 chaperones by DnaJ co-chaperones. *Biochem J* 96: 5.
37. Gething MJ, Blond-Elguindi S, Buchner J, Fourie A, Knarr G, et al. (1995) Binding sites for Hsp70 molecular chaperones in natural proteins. *Cold Spring Harb Symp Quant Biol* 60, 417–428.
38. Davis DP, Khurana R, Meredith S, Stevens FJ, Argon Y (1999) Mapping the major interaction between binding protein and Ig light chains to sites within the variable domain. *J Immunol* 163 (7): 3842–3850.
39. Sanchez de Groot N, Pallarés I, Alivés FX, Vendrell J, Ventura S (2005) Prediction of “hot spots” of aggregation in disease-linked polypeptides. *BMC Struct Biol* 5: 18.40.
40. Ben-Zvi A, De Los Rios P, Dietler G, Goloubinoff (2004) Active solubilization and refolding of stable protein aggregates by cooperative unfolding action of individual hsp70 chaperones. *J Biol Chem* 279 (36): 37298–37303.
41. De Los Rios P, Ben-Zvi A, Slutsky O, Azem A, Goloubinoff P (2006) Hsp70 chaperones accelerate protein translocation and the unfolding of stable protein aggregates by entropic pulling. *Proc Natl Acad Sci U S A* 103 (16): 6166–6171.
42. Goloubinoff P and De Los Rios P (2007) The mechanism of Hsp70 chaperones: (entropic) pulling the models together. *Trends Biochem Sci* 32 (8): 372–380.
43. Bialek W. and Setayeshgar S (2008) Cooperativity, sensitivity, and noise in biochemical signaling. *Phys Rev Lett* 100 (25): 258101.
44. Dmitrieff S, Sens P (2011) Cooperative protein transport in cellular organelles. *Phys Rev E Stat Nonlin Soft Matter Phys* 83: 8.
45. Sourjik V (2004) Receptor clustering and signal processing in *E. coli* chemotaxis. *Trends in Microbiol* 12: 7.
46. Misselwitz B, Staack O, Rapoport TA (1998) J proteins catalytically activate Hsp70 molecules to trap a wide range of peptide sequences. *Mol Cell* 2 (5): 593–603.
47. Misselwitz B, Staack O, Matlack KE, Rapoport TA (1999) Interaction of BiP with the J-domain of the Sec63p component of the endoplasmic reticulum protein translocation complex. *J Biol Chem* 274 (29): 20110–20115.
48. Mayer M, Reinstein J, Buchner J (2003) Modulation of the ATPase cycle of BiP by peptides and proteins. *J Mol Biol* 330 (1): 137–144.
49. Powers ET, Powers DL, Gierasch LM (2012) FoldEco: a model for proteostasis in *E. coli*. *Cell Rep* 1 (3): 265–276.
50. Proctor CJ and Lorimer IA (2011) Modelling the role of the Hsp70/Hsp90 system in the maintenance of protein homeostasis. *PLoS One* 6 (7): e22038.
51. Rieger TR, Morimoto RI, Hatzimanikatis V (2006) Bistability explains threshold phenomena in protein aggregation both in vitro and in vivo. *Biophys J* 90 (3): 886–895.
52. Rieger TR, Morimoto RI, Hatzimanikatis V (2005) Mathematical modeling of the eukaryotic heat-shock response: dynamics of the hsp70 promoter. *Biophys J* 88 (3): 1646–1658.
53. Onn A and Ron D (2010) Modeling the endoplasmic reticulum unfolded protein response. *Nat Struct Mol Biol* 17 (8): 924–925.
54. Hildebrandt S, Raden D, Petzold L, Robinson AS, Doyle III FJ (2008) A top-down approach to mechanistic biological modeling: application to the single-chain antibody folding pathway. *Biophys J* 95 (8): 3535–3558.
55. Wiseman RL, Powers ET, Buxbaum JN, Kelly JW, Balch WE (2007) An adaptable standard for protein export from the endoplasmic reticulum. *Cell* 131 (4): 809–821.
56. Proctor CJ, Tsigotis M, Gray DA (2007) An in silico model of the ubiquitin-proteasome system that incorporates normal homeostasis and age-related decline. *BMC Syst Biol* 1, 17.
57. Hu B and Tomita M (2007) The Hsp70 chaperone system maintains high concentrations of active proteins and suppresses ATP consumption during heat shock. *Syst Synth Biol* 1 (1): 47–58.
58. Hu B, Mayer MP, Tomita M (2006) Modeling Hsp70-mediated protein folding. *Biophys J* 91 (2): 496–507.
59. Robinson AS and Lauffenberger DL (1996) Model for ER chaperone dynamics and secretory protein interactions. *AICHE J* 42: 10.
60. Perktold A, Zechmann B, Daum G, Zellnig G (2007) Organelle association visualized by three-dimensional ultrastructural imaging of the yeast cell. *FEMS Yeast Res* 7 (4): 629–638.
61. Liebermeister W, Rapoport TA, Heinrich R (2001) Ratcheting in post-translational protein translocation: a mathematical model. *J Mol Biol* 305 (3): 643–656.
62. Elston TC (2000) Models of post-translational protein translocation. *Biophys J* 79 (5): 2235–2251.
63. Elston TC (2002) The brownian ratchet and power stroke models for posttranslational protein translocation into the endoplasmic reticulum. *Biophys J* 82 (3): 1239–1253.
64. Kinjo AR and Takada S (2003) Competition between protein folding and aggregation with molecular chaperones in crowded solutions: insight from mesoscopic simulations. *Biophys J* 85 (6): 3521–3531.
65. Ellis RJ and Hartl FU (1999) Principles of protein folding in the cellular environment. *Curr Opin Struct Biol* 9 (1): 102–110.
66. Swanton E and Bulleid NJ (2003) Protein folding and translocation across the endoplasmic reticulum membrane. *Mol Membr Biol* 20 (2): 99–104.
67. Hartl FU and Hayer-Hartl M (2009) Converging concepts of protein folding in vitro and in vivo. *Nat Struct Mol Biol* 16 (6): 574–581.
68. Diamant S, Ben-Zvi AP, Bukau B, Goloubinoff P (2000) Size-dependent disaggregation of stable protein aggregates by the DnaK chaperone machinery. *J Biol Chem* 275 (28): 21107–21113.
69. Kiefhaber T, Rudolph R, Kohler H-H, Buchner J (1991) Protein aggregation in vitro and in vivo: a quantitative model of the kinetic competition between folding and aggregation. *Biotechnology (N Y)* 9 (9): 825–829.
70. Sharma SK, Christen P, Goloubinoff P (2009) Disaggregating chaperones: an unfolding story. *Curr Protein Pept Sci* 10 (5): 432–446.
71. Ben-Zvi AP and Goloubinoff P (2001) Review: mechanisms of disaggregation and refolding of stable protein aggregates by molecular chaperones. *J Struct Biol* 135 (2): 84–93.
72. Acebrón SP, Fernández-Sáiz V, Taneva SG, Moro F, Muga A (2008) DnaJ recruits DnaK to protein aggregates. *J Biol Chem* 283 (3): 1381–1390.

73. Slepnev SV and Witt SN (2002) The unfolding story of the Escherichia coli Hsp70 DnaK: is DnaK a holdase or an unfoldase? *Mol Microbiol* 45 (5): 1197–1206.
74. Schnell S (2009) A model of the Unfolded Protein Response: Pancreatic Beta-cell as a case study. *Cellular Physiol and Biochem* 23: 11.
75. Chauwin JF, Oster G, Glick BS (1998) Strong precursor-pore interactions constrain models for mitochondrial protein import. *Biophys J* 74 (4): 1732–1743.
76. Kepler TB and Elston TC (2001) Stochasticity in transcriptional regulation: origins, consequences, and mathematical representations. *Biophys J* 81 (6): 3116–3136.
77. Klappa P, Mayinger P, Pipkorn R, Zimmermann M, Zimmermann R (1991) A microsomal protein is involved in ATP-dependent transport of presecretory proteins into mammalian microsomes. *EMBO J* 10 (10): 2795–2803.
78. Dierks T, Volkmer J, Schlenstedt G, Jung C, Sandholzer U, et al. (1996) A microsomal ATP-binding protein involved in efficient protein transport into the mammalian endoplasmic reticulum. *EMBO J* 15 (24): 6931–6942.
79. Nicchitta CV and Blobel G (1993) Luminal proteins of the mammalian endoplasmic reticulum are required to complete protein translocation. *Cell* 73 (5): 989–998.
80. Tyedmers J, Lerner M, Wiedmann M, Volkmer J, Zimmermann R (2003) Polypeptide-binding proteins mediate completion of co-translational protein translocation into the mammalian endoplasmic reticulum. *EMBO Rep* 4 (5): 505–510.
81. Shaffer KL, Sharma A, Snapp EL, Hegde RS (2005) Regulation of protein compartmentalization expands the diversity of protein function. *Dev Cell* 9 (4): 545–554.
82. Tyedmers J, Lerner M, Bies C, Dudek J, Skowronek MH, et al. (2000) Homologs of the yeast Sec complex subunits Sec62p and Sec63p are abundant proteins in dog pancreas microsomes. *Proc Natl Acad Sci U S A* 97 (13): 7214–7219.
83. Trueman SF, Mandon EC, Gilmore R (2011) Translocation channel gating kinetics balances protein translocation efficiency with signal sequence recognition fidelity. *Mol Biol Cell* 22 (17): 2983–2993.
84. Reithinger JH, Yim C, Kim S, Lee H, Kim H (2014) Structural and functional profiling of the lateral gate of the Sec61 translocon. *J Biol Chem* [epub ahead of print]
85. Lang S, Benedix J, Fedeles SV, Schorr S, Schirra C, et al. (2012) Different effects of Sec61alpha, Sec62 and Sec63 depletion on transport of polypeptides into the endoplasmic reticulum of mammalian cells. *J Cell Sci* 125 (Pt 8): 1958–1969.
86. Levi V and Gratton E (2007) Exploring dynamics in living cells by tracking single particles. *Cell Biochem Biophys* 48 (1): 1–15.
87. Han R, Li Z, Fan Y, Jiang Y (2013) Recent advances in super-resolution fluorescence imaging and its applications in biology. *J Genet Genomics* 40 (12): 583–595.
88. Young CL, Raden DL, Caplan JL, Czymmek KJ, Robinson AS (2012) Cassette series designed for live-cell imaging of proteins and high-resolution techniques in yeast. *Yeast* 29 (3–4): 119–136.
