# Supplementary material for: BiP Clustering Facilitates Protein Folding in the Endoplasmic Reticulum
Source: PubMed Central journal article supplement (PMC4081015; doi:10.1371/journal.pcbi.1003675), 2014-07-03
Supplement: pcbi.1003675.s002.pdf [file pcbi.1003675.s002.pdf]

## Supplement Text S1: List of Species and Reactions

### Content

This file contains the species and reaction lists for the clustering model.

### Species Tables

**Table S1.** Model Species and Initial Counts [?]

|    | Species            | Description                       | Molecules |
|----|--------------------|-----------------------------------|-----------|
| 1  | N                  | Nascent protein                   | 0         |
| 2  | Pore               | Translocon                        | 6000      |
| 3  | Sec63              | ER membrane co-chaperone          | 17700     |
| 4  | Pore-Sec63         | Activated pore                    | 0         |
| 5  | Pore-Sec63-N       | Docked protein                    | 0         |
| 6  | BiP                | Free chaperone                    | 337000    |
| 7  | Pore-Sec63-Nx      | Sliding state                     | 0         |
| 8  | Pore-Sec63-N-BiP   | 1 bound BiP                       | 0         |
| 9  | Pore-Sec63-N-BiPx  | Sliding state                     | 0         |
| 10 | Pore-Sec63-N-2BiP  | 2 bound BiP                       | 0         |
| 11 | Pore-Sec63-N-2BiPx | Sliding state                     | 0         |
| 12 | Pore-Sec63-N-3BiP  | 3 bound BiP                       | 0         |
| 13 | Pore-Sec63-N-3BiPx | Sliding state                     | 0         |
| 14 | Pore-Sec63-N-4BiP  | 4 bound BiP                       | 0         |
| 15 | U                  | Unfolded Protein                  | 1000000   |
| 16 | F                  | Folded Protein                    | 0         |
| 17 | M                  | Misfolded Protein                 | 0         |
| 18 | A2                 | Size 2 Aggregate                  | 0         |
| 19 | A3                 | Size 3 Aggregate                  | 0         |
| 20 | A4                 | Size 4 Aggregate                  | 0         |
| 21 | U-BiP              | Chaperone-protein complex         | 0         |
| 22 | U-2BiP             | CP complex (Model 2+)             | 0         |
| 23 | U-3BiP             | CP complex (Model 3+)             | 0         |
| 24 | U-4BiP             | CP complex (Model 4)              | 0         |
| 25 | M-BiP              | Chaperone-triaged protein complex | 0         |
| 26 | M-2BiP             | CT complex (Model 2+)             | 0         |
| 27 | M-3BiP             | CT complex (Model 3+)             | 0         |
| 28 | M-4BiP             | CT complex (Model 4)              | 0         |
| 29 | Scj1               | Lumenal co-chaperone              | 8260      |
| 30 | U-Scj1             | Co-chaperone/protein complex      | 0         |
| 31 | U-Scj1-BiP         | Chaperone-protein complex         | 0         |
| 32 | U-Scj1-2BiP        | CP complex (Model 2+)             | 0         |

*continued on next page*

*continued from previous page*

|    | Species      | Description                         | Molecules |
|----|--------------|-------------------------------------|-----------|
| 33 | U-Scj1-3BiP  | CP complex (Model 3+)               | 0         |
| 34 | U-Scj1-4BiP  | CP complex (Model 4)                | 0         |
| 35 | M-Scj1       | Cochaperone-triaged protein complex | 0         |
| 36 | M-Scj1-BiP   | CM complex                          | 0         |
| 37 | M-Scj1-2BiP  | CM complex (Model 2+)               | 0         |
| 38 | M-Scj1-3BiP  | CM complex (Model 3+)               | 0         |
| 39 | M-Scj1-4BiP  | CM complex (Model 4)                | 0         |
| 40 | A2-BiP       | Size 2 (Model 2+)                   | 0         |
| 41 | A2-2BiP      | Size 2 (Model 2+)                   | 0         |
| 42 | A2-Scj1      | Size 2 (Model 1+)                   | 0         |
| 43 | A2-Scj1-BiP  | Size 2 (Model 1+)                   | 0         |
| 44 | A2-Scj1-2BiP | Size 2 (Model 2+)                   | 0         |
| 45 | A3-BiP       | Size 3 (Model 1+)                   | 0         |
| 46 | A3-2BiP      | Size 3 (Model 2+)                   | 0         |
| 47 | A3-3BiP      | Size 3 (Model 3+)                   | 0         |
| 48 | A3-Scj1      | Size 3 (Model 1+)                   | 0         |
| 49 | A3-Scj1-BiP  | Size 3 (Model 1+)                   | 0         |
| 50 | A3-Scj1-2BiP | Size 3 (Model 2+)                   | 0         |
| 51 | A3-Scj1-3BiP | Size 3 (Model 3+)                   | 0         |
| 52 | A4-BiP       | Size 4 (Model 1+)                   | 0         |
| 53 | A4-2BiP      | Size 4 (Model 2+)                   | 0         |
| 54 | A4-3BiP      | Size 4 (Model 3+)                   | 0         |
| 55 | A4-4BiP      | Size 4 (Model 4+)                   | 0         |
| 56 | A4-Scj1      | Size 4 (Model 1+)                   | 0         |
| 57 | A4-Scj1-BiP  | Size 4 (Model 1+)                   | 0         |
| 58 | A4-Scj1-2BiP | Size 4 (Model 2+)                   | 0         |
| 59 | A4-Scj1-3BiP | Size 4 (Model 3+)                   | 0         |
| 60 | A4-Scj1-4BiP | Size 4 (Model 4+)                   | 0         |

## Reaction Tables

**Table S2.** Translocation Reactions

|    | Reaction                                                 | Kinetic Rate     | Units           | Reference |
|----|----------------------------------------------------------|------------------|-----------------|-----------|
| 1  | $\emptyset \rightarrow N$                                | 0                | $M s^{-1}$      |           |
| 2  | $Pore + Sec63 \leftrightarrow Pore-Sec63$                | $10^6$           | $M^{-1} s^{-1}$ |           |
| 3  | $Pore-Sec63 + N \leftrightarrow Pore-Sec63-N$            | $10^6$           | $M^{-1} s^{-1}$ |           |
| 4  | $Pore-Sec63-N \leftrightarrow Pore-Sec63-Nx$             | 1.0              | $s^{-1}$        |           |
| 5  | $Pore-Sec63-Nx + BiP \rightarrow Pore-Sec63-N-BiP$       | $3.5 \cdot 10^8$ | $M^{-1} s^{-1}$ | [?]       |
| 6  | $Pore-Sec63-N-BiP \leftrightarrow Pore-Sec63-N-BiPx$     | 1.0              | $s^{-1}$        |           |
| 7  | $Pore-Sec63-N-BiPx + BiP \rightarrow Pore-Sec63-N-2BiP$  | $3.5 \cdot 10^8$ | $M^{-1} s^{-1}$ | [?]       |
| 8  | $Pore-Sec63-N-2BiP \leftrightarrow Pore-Sec63-N-2BiPx$   | 1.0              | $s^{-1}$        |           |
| 9  | $Pore-Sec63-N-2BiPx + BiP \rightarrow Pore-Sec63-N-3BiP$ | $3.5 \cdot 10^8$ | $M^{-1} s^{-1}$ | [?]       |
| 10 | $Pore-Sec63-N-3BiP \leftrightarrow Pore-Sec63-N-3BiPx$   | 1.0              | $s^{-1}$        |           |
| 11 | $Pore-Sec63-N-3BiPx + BiP \rightarrow Pore-Sec63-N-4BiP$ | $3.5 \cdot 10^8$ | $M^{-1} s^{-1}$ | [?]       |
| 12 | $Pore-Sec63-N-4BiP \rightarrow Pore-Sec63-N-3BiP + BiP$  | 2.0              | $s^{-1}$        | [?]       |
| 13 | $Pore-Sec63-N-3BiP \rightarrow Pore-Sec63-N-2BiP + BiP$  | 2.0              | $s^{-1}$        | [?]       |
| 14 | $Pore-Sec63-N-3BiP \rightarrow Pore-Sec63-N-2BiP + BiP$  | 2.0              | $s^{-1}$        | [?]       |
| 15 | $Pore-Sec63-N-2BiP \rightarrow Pore-Sec63-N-BiP + BiP$   | 2.0              | $s^{-1}$        | [?]       |
| 16 | $Pore-Sec63-N-4BiP \rightarrow Pore + Sec63 + U-4BiP$    | 1.0              | $s^{-1}$        |           |
| 17 | $Pore-Sec63-N-3BiP \rightarrow Pore + Sec63 + U-3BiP$    | 1.0              | $s^{-1}$        |           |
| 18 | $Pore-Sec63-N-2BiP \rightarrow Pore + Sec63 + U-2BiP$    | 1.0              | $s^{-1}$        |           |
| 19 | $Pore-Sec63-N-BiP \rightarrow Pore + Sec63 + U-BiP$      | 1.0              | $s^{-1}$        |           |

**Table S3.** Aggregation Reactions

|    | Reaction                 | Kinetic Rate | Units           | Reference |
|----|--------------------------|--------------|-----------------|-----------|
| 20 | $U + U \rightarrow A2$   | $10^6$       | $M^{-1} s^{-1}$ | [?, ?]    |
| 21 | $M + U \rightarrow A2$   | $10^6$       | $M^{-1} s^{-1}$ | [?, ?]    |
| 22 | $M + M \rightarrow A2$   | $10^6$       | $M^{-1} s^{-1}$ | [?, ?]    |
| 23 | $A2 + U \rightarrow A3$  | $10^7$       | $M^{-1} s^{-1}$ | [?]       |
| 24 | $A2 + M \rightarrow A3$  | $10^7$       | $M^{-1} s^{-1}$ | [?]       |
| 25 | $A3 + U \rightarrow A4$  | $10^7$       | $M^{-1} s^{-1}$ | [?]       |
| 26 | $A3 + M \rightarrow A4$  | $10^7$       | $M^{-1} s^{-1}$ | [?]       |
| 27 | $A2 + A2 \rightarrow A4$ | $10^7$       | $M^{-1} s^{-1}$ | [?]       |

Table S4. Disaggregation Reactions

|    | Reaction                                          | Kinetic Rate     | Units          | Reference |
|----|---------------------------------------------------|------------------|----------------|-----------|
| 28 | $A2 + BiP \leftrightarrow A2-BiP$                 | $8.3 \cdot 10^5$ | $M^{-1}s^{-1}$ | [?]       |
| 29 | $A2-BiP + BiP \leftrightarrow A2-2BiP$            | $8.3 \cdot 10^5$ | $M^{-1}s^{-1}$ | [?]       |
| 30 | $A2-BiP \rightarrow M-BiP + M$                    | 1.0              | $s^{-1}$       |           |
| 31 | $A2-2BiP \rightarrow M-BiP + M-BiP$               | 1.0              | $s^{-1}$       |           |
| 32 | $A2 + Scj1 \leftrightarrow A2-Scj1$               | $8.3 \cdot 10^5$ | $M^{-1}s^{-1}$ | [?]       |
| 33 | $A2-Scj1 + BiP \leftrightarrow A2-Scj1-BiP$       | $3.5 \cdot 10^8$ | $M^{-1}s^{-1}$ | [?]       |
| 34 | $A2-Scj1-BiP + BiP \leftrightarrow A2-Scj1-2BiP$  | $3.5 \cdot 10^8$ | $s^{-1}$       | [?]       |
| 35 | $A2-Scj1-BiP \rightarrow M-Scj1 + M-BiP$          | 1.0              | $s^{-1}$       |           |
| 36 | $A2-Scj1-2BiP \rightarrow M-Scj1-BiP + M-BiP$     | 1.0              | $s^{-1}$       |           |
| 37 | $A3 + BiP \leftrightarrow A3-BiP$                 | $8.3 \cdot 10^5$ | $M^{-1}s^{-1}$ | [?]       |
| 38 | $A3-BiP + BiP \leftrightarrow A3-2BiP$            | $8.3 \cdot 10^5$ | $M^{-1}s^{-1}$ | [?]       |
| 39 | $A3-2BiP + BiP \leftrightarrow A3-3BiP$           | $8.3 \cdot 10^5$ | $M^{-1}s^{-1}$ | [?]       |
| 40 | $A3-BiP \rightarrow A2 + M-BiP$                   | 1.0              | $s^{-1}$       |           |
| 41 | $A3-2BiP \rightarrow A2-BiP + M-BiP$              | $8.3 \cdot 10^5$ | $M^{-1}s^{-1}$ | [?]       |
| 42 | $A3-3BiP \rightarrow A2-2BiP + M-BiP$             | $8.3 \cdot 10^5$ | $M^{-1}s^{-1}$ | [?]       |
| 43 | $A3 + Scj1 \rightarrow A3-Scj1$                   | $8.3 \cdot 10^5$ | $M^{-1}s^{-1}$ | [?]       |
| 44 | $A3-Scj1 + BiP \leftrightarrow A3-Scj1-BiP$       | $3.5 \cdot 10^8$ | $M^{-1}s^{-1}$ | [?]       |
| 45 | $A3-Scj1-BiP + BiP \leftrightarrow A3-Scj1-2BiP$  | $3.5 \cdot 10^8$ | $M^{-1}s^{-1}$ | [?]       |
| 46 | $A3-Scj1-2BiP + BiP \leftrightarrow A3-3BiP$      | $3.5 \cdot 10^8$ | $M^{-1}s^{-1}$ | [?]       |
| 47 | $A3-Scj1 \rightarrow A2 + M-Scj1$                 | 1.0              | $s^{-1}$       |           |
| 48 | $A3-Scj1-BiP \rightarrow A2-Scj1 + M-BiP$         | 1.0              | $s^{-1}$       |           |
| 49 | $A3-Scj1-2BiP \rightarrow A2-Scj1-BiP + M-BiP$    | 1.0              | $s^{-1}$       |           |
| 50 | $A3-Scj1-3BiP \rightarrow A2-Scj1-2BiP + M-2BiP$  | 1.0              | $s^{-1}$       |           |
| 51 | $A4 + BiP \leftrightarrow A4-BiP$                 | $8.3 \cdot 10^5$ | $M^{-1}s^{-1}$ | [?]       |
| 52 | $A4-BiP + BiP \leftrightarrow A4-2BiP$            | $8.3 \cdot 10^5$ | $M^{-1}s^{-1}$ | [?]       |
| 53 | $A4-2BiP + BiP \leftrightarrow A4-3BiP$           | $8.3 \cdot 10^5$ | $M^{-1}s^{-1}$ | [?]       |
| 54 | $A4-3BiP + BiP \leftrightarrow A4-4BiP$           | $8.3 \cdot 10^5$ | $M^{-1}s^{-1}$ | [?]       |
| 55 | $A4 + Scj1 \leftrightarrow A4-Scj1$               | $8.3 \cdot 10^5$ | $M^{-1}s^{-1}$ | [?]       |
| 56 | $A4-Scj1 + BiP \leftrightarrow A4-Scj1-BiP$       | $3.5 \cdot 10^8$ | $M^{-1}s^{-1}$ | [?]       |
| 57 | $A4-Scj1-BiP + BiP \leftrightarrow A4-Scj1-2BiP$  | $3.5 \cdot 10^8$ | $M^{-1}s^{-1}$ | [?]       |
| 58 | $A4-Scj1-2BiP + BiP \leftrightarrow A4-Scj1-3BiP$ | $3.5 \cdot 10^8$ | $M^{-1}s^{-1}$ | [?]       |
| 59 | $A4-Scj1-3BiP + BiP \leftrightarrow A4-Scj1-4BiP$ | $3.5 \cdot 10^8$ | $M^{-1}s^{-1}$ | [?]       |
| 60 | $A4-BiP \rightarrow A3 + M-BiP$                   | 1.0              | $s^{-1}$       |           |
| 61 | $A4-2BiP \rightarrow A3-BiP + M-BiP$              | 1.0              | $s^{-1}$       |           |
| 62 | $A4-3BiP \rightarrow A3-2BiP + M-BiP$             | 1.0              | $s^{-1}$       |           |
| 63 | $A4-4BiP \rightarrow A3-3BiP + M-BiP$             | 1.0              | $s^{-1}$       |           |

**Table S5.** Binding Reactions

|    | Reaction                                   | Kinetic Rate        | Units                  | Reference |
|----|--------------------------------------------|---------------------|------------------------|-----------|
| 64 | $U + BiP \leftrightarrow U-BiP$            | $8.3 \cdot 10^5, 2$ | $M^{-1}s^{-1}, s^{-1}$ | [?, ?]    |
| 65 | $U-BiP + BiP \leftrightarrow U-2BiP$       | $8.3 \cdot 10^5, 2$ | $M^{-1}s^{-1}, s^{-1}$ | [?, ?]    |
| 66 | $U-2BiP + BiP \leftrightarrow U-3BiP$      | $8.3 \cdot 10^5, 2$ | $M^{-1}s^{-1}, s^{-1}$ | [?, ?]    |
| 67 | $U-3BiP + BiP \leftrightarrow U-4BiP$      | $8.3 \cdot 10^5, 2$ | $M^{-1}s^{-1}, s^{-1}$ | [?, ?]    |
| 68 | $U + Scj1 \leftrightarrow U-Scj1$          | $8.3 \cdot 10^5, 2$ | $M^{-1}s^{-1}, s^{-1}$ | [?, ?]    |
| 69 | $U-Scj1 + BiP \leftrightarrow U-Scj1-BiP$  | $3.5 \cdot 10^8, 2$ | $M^{-1}s^{-1}, s^{-1}$ | [?, ?]    |
| 70 | $U-Scj1-BiP + BiP \leftrightarrow U-2BiP$  | $3.5 \cdot 10^8, 2$ | $M^{-1}s^{-1}, s^{-1}$ | [?, ?]    |
| 71 | $U-Scj1-2BiP + BiP \leftrightarrow U-3BiP$ | $3.5 \cdot 10^8, 2$ | $M^{-1}s^{-1}, s^{-1}$ | [?, ?]    |
| 72 | $U-Scj1-3BiP + BiP \leftrightarrow U-4BiP$ | $3.5 \cdot 10^8, 2$ | $M^{-1}s^{-1}, s^{-1}$ | [?, ?]    |

**Table S6.** Folding Reactions

|    | Reaction                                  | Kinetic Rate | Units    | Reference |
|----|-------------------------------------------|--------------|----------|-----------|
| 73 | $U \rightarrow F$                         | $10^{-3}$    | $s^{-1}$ | [?]       |
| 74 | $U-BiP \rightarrow F + BiP$               | 0.1          | $s^{-1}$ | [?]       |
| 75 | $U-2BiP \rightarrow F + 2BiP$             | 0.1          | $s^{-1}$ | [?]       |
| 76 | $U-3BiP \rightarrow F + 3BiP$             | 0.1          | $s^{-1}$ | [?]       |
| 77 | $U-4BiP \rightarrow F + 4BiP$             | 0.1          | $s^{-1}$ | [?]       |
| 78 | $U-Scj1 \rightarrow F + Scj1$             | 0.1          | $s^{-1}$ | [?]       |
| 79 | $U-Scj1-BiP \rightarrow F + Scj1 + BiP$   | 0.1          | $s^{-1}$ | [?]       |
| 80 | $U-Scj1-2BiP \rightarrow F + Scj1 + 2BiP$ | 0.1          | $s^{-1}$ | [?]       |
| 81 | $U-Scj1-3BiP \rightarrow F + Scj1 + 3BiP$ | 0.1          | $s^{-1}$ | [?]       |
| 82 | $U-Scj1-4BiP \rightarrow F + Scj1 + 4BiP$ | 0.1          | $s^{-1}$ | [?]       |

**Table S7.** Misfolding/Unfolding Reactions

|     | Reaction                                        | Kinetic Rate     | Units          | Reference |
|-----|-------------------------------------------------|------------------|----------------|-----------|
| 83  | $U \rightarrow M$                               | 10               | $s^{-1}$       |           |
| 84  | $M + BiP \leftrightarrow M-BiP$                 | $8.3 \cdot 10^5$ | $M^{-1}s^{-1}$ | [?]       |
| 85  | $M-BiP + BiP \leftrightarrow M-2BiP$            | $8.3 \cdot 10^5$ | $M^{-1}s^{-1}$ | [?]       |
| 86  | $M-2BiP + BiP \leftrightarrow M-3BiP$           | $8.3 \cdot 10^5$ | $M^{-1}s^{-1}$ | [?]       |
| 87  | $M-3BiP + BiP \leftrightarrow M-4BiP$           | $8.3 \cdot 10^5$ | $M^{-1}s^{-1}$ | [?]       |
| 88  | $M + Scj1 \leftrightarrow M-Scj1$               | $8.3 \cdot 10^5$ | $M^{-1}s^{-1}$ | [?]       |
| 89  | $M-Scj1 + BiP \leftrightarrow M-Scj1-BiP$       | $3.5 \cdot 10^8$ | $M^{-1}s^{-1}$ | [?]       |
| 90  | $M-Scj1-BiP + BiP \leftrightarrow M-Scj1-2BiP$  | $3.5 \cdot 10^8$ | $M^{-1}s^{-1}$ | [?]       |
| 91  | $M-Scj1-2BiP + BiP \leftrightarrow M-Scj1-3BiP$ | $3.5 \cdot 10^8$ | $M^{-1}s^{-1}$ | [?]       |
| 92  | $M-Scj1-3BiP + BiP \leftrightarrow M-Scj1-4BiP$ | $3.5 \cdot 10^8$ | $M^{-1}s^{-1}$ | [?]       |
| 93  | $M-BiP \rightarrow U-BiP$                       | 1.0              | $s^{-1}$       |           |
| 94  | $M-2BiP \rightarrow U-2BiP$                     | 1.0              | $s^{-1}$       |           |
| 95  | $M-3BiP \rightarrow U-3BiP$                     | 1.0              | $s^{-1}$       |           |
| 96  | $M-4BiP \rightarrow U-4BiP$                     | 1.0              | $s^{-1}$       |           |
| 97  | $M-Scj1 \rightarrow U-Scj1$                     | 1.0              | $s^{-1}$       |           |
| 98  | $M-Scj1-BiP \rightarrow U-Scj1-BiP$             | 1.0              | $s^{-1}$       |           |
| 99  | $M-Scj1-2BiP \rightarrow U-Scj1-2BiP$           | 1.0              | $s^{-1}$       |           |
| 100 | $M-Scj1-3BiP \rightarrow U-Scj1-3BiP$           | 1.0              | $s^{-1}$       |           |
| 101 | $M-Scj1-4BiP \rightarrow U-Scj1-4BiP$           | 1.0              | $s^{-1}$       |           |

**Table S8.** Sequestering Reactions

|     | Reaction                                  | Kinetic Rate | Units    | Reference |
|-----|-------------------------------------------|--------------|----------|-----------|
| 102 | $A2 \rightarrow I-A2$                     | 1.0          | $s^{-1}$ | [?]       |
| 103 | $A2-BiP \rightarrow I-A2-BiP$             | 1.0          | $s^{-1}$ | [?]       |
| 104 | $A2-2BiP \rightarrow I-A2-2BiP$           | 1.0          | $s^{-1}$ | [?]       |
| 105 | $A2-Scj1 \rightarrow I-A2-Scj1$           | 1.0          | $s^{-1}$ | [?]       |
| 106 | $A2-Scj1-BiP \rightarrow I-A2-Scj1-BiP$   | 1.0          | $s^{-1}$ | [?]       |
| 107 | $A2-Scj1-2BiP \rightarrow I-A2-Scj1-2BiP$ | 1.0          | $s^{-1}$ | [?]       |
| 108 | $A3 \rightarrow I-A3$                     | 1.0          | $s^{-1}$ | [?]       |
| 109 | $A3-BiP \rightarrow I-A3-BiP$             | 1.0          | $s^{-1}$ | [?]       |
| 110 | $A3-2BiP \rightarrow I-A3-2BiP$           | 1.0          | $s^{-1}$ | [?]       |
| 111 | $A3-3BiP \rightarrow I-A3-3BiP$           | 1.0          | $s^{-1}$ | [?]       |
| 112 | $A3-Scj1 \rightarrow I-Scj1$              | 1.0          | $s^{-1}$ | [?]       |
| 113 | $A3-Scj1-BiP \rightarrow I-A3-Scj1-BiP$   | 1.0          | $s^{-1}$ | [?]       |
| 114 | $A3-Scj1-2BiP \rightarrow I-A3-Scj1-2BiP$ | 1.0          | $s^{-1}$ | [?]       |
| 115 | $A3-Scj1-3BiP \rightarrow I-A3-Scj1-3BiP$ | 1.0          | $s^{-1}$ | [?]       |
| 116 | $A4 \rightarrow I-A4$                     | 1.0          | $s^{-1}$ | [?]       |
| 117 | $A4-BiP \rightarrow I-A4-BiP$             | 1.0          | $s^{-1}$ | [?]       |
| 118 | $A4-2BiP \rightarrow I-A4-2BiP$           | 1.0          | $s^{-1}$ | [?]       |
| 119 | $A4-3BiP \rightarrow I-A4-3BiP$           | 1.0          | $s^{-1}$ | [?]       |
| 120 | $A4-4BiP \rightarrow I-A4-4BiP$           | 1.0          | $s^{-1}$ | [?]       |
| 121 | $A4-Scj1 \rightarrow I-A4-Scj1$           | 1.0          | $s^{-1}$ | [?]       |
| 122 | $A4-Scj1-BiP \rightarrow I-A4-Scj1-BiP$   | 1.0          | $s^{-1}$ | [?]       |
| 123 | $A4-Scj1-2BiP \rightarrow I-A4-Scj1-2BiP$ | 1.0          | $s^{-1}$ | [?]       |
| 124 | $A4-Scj1-3BiP \rightarrow I-A4-Scj1-3BiP$ | 1.0          | $s^{-1}$ | [?]       |
| 125 | $A4-Scj1-4BiP \rightarrow I-A4-Scj1-4BiP$ | 1.0          | $s^{-1}$ | [?]       |
